# Supplementary material for: Pyrazinacene conjugated polymers: a breakthrough in synthesis and unraveling the conjugation continuum
Source: Royal Society of Chemistry journal article supplement (doi:10.1039/d3sc06552a), 2024-01-01
Supplement: d3sc06552a2.pdf [file d3sc06552a2.pdf]

Supporting Information: DFT  
Pyrazinacene Conjugated Polymers:

A Breakthrough in Synthesis and Unraveling the Conjugation Continuum

Fatima Hameed,<sup>a,b,‡</sup> Arindam Maity,<sup>a,b,‡</sup> Victor S. Francis<sup>a,b</sup>, and Nagarjuna Gavvalapalli<sup>a,b,\*</sup>

<sup>a</sup>Department of Chemistry, <sup>b</sup>Institute for Soft Matter Synthesis and Metrology, Georgetown University, Washington, D.C., 20057, USA

‡ These authors contributed equally.

\*(Corresponding author email: ng554@georgetown.edu)

## Contents

|                                                                 |     |
|-----------------------------------------------------------------|-----|
| 1.0 N6P-Br coordinates.....                                     | S2  |
| 2.0 N6P-Br Dimer coordinates.....                               | S3  |
| 3.0 N6P-Ph coordinates .....                                    | S11 |
| 4.0 N6P-Ph dimer coordinates .....                              | S13 |
| 5.0 N6P-Bu coordinates .....                                    | S25 |
| 6.0 N6P-Bu dimer coordinates.....                               | S27 |
| 7.0 N4A coordinates .....                                       | S40 |
| 8.0 N4A dimer coordinates .....                                 | S41 |
| 9.0 N4A dimer (0 degrees) radical anion coordinates.....        | S48 |
| 10.0 N6P-Br dimer (0 degrees) radical anion coordinates .....   | S50 |
| 11.0 N6P-Bu dimer (180 degrees) radical anion coordinates ..... | S52 |
| 12.0 N6P-Ph dimer (180 degrees) radical anion coordinates.....  | S57 |

The default integration grid in Gaussian 16, Ultrafine, was used.

## Optimized Geometry Coordinates

### 1.0 N6P-Br coordinates

Electronic Energy (EE:): -6702.104156 Hartree

EE + Thermal Free Energy Correction: -6701.808407 Hartree

E (Thermal): 249.536 kcal/mol

Entropy (S): 216.480 cal/mol-kelvin

Imaginary Freq: 0

| 0 | 1        |          |          |
|---|----------|----------|----------|
| C | -5.24278 | -0.71154 | -0.00748 |
| C | -4.04439 | -1.40511 | -0.01071 |
| C | -4.04438 | 1.40512  | 0.010726 |
| C | -5.24279 | 0.711554 | 0.007381 |
| O | -6.43709 | 1.367568 | -0.03341 |
| O | -6.43711 | -1.36752 | 0.033135 |
| C | -7.14793 | 1.425925 | 1.217033 |
| H | -8.06862 | 1.969417 | 1.010558 |
| H | -7.3801  | 0.421506 | 1.577055 |
| H | -6.56185 | 1.971334 | 1.962096 |
| C | -7.14762 | -1.42603 | -1.21749 |
| H | -8.06829 | -1.96965 | -1.01123 |
| H | -7.37986 | -0.42165 | -1.57759 |
| H | -6.56129 | -1.97137 | -1.96239 |
| N | -1.63176 | -1.4048  | 0.002421 |
| C | -0.5271  | -0.72147 | 0.001834 |
| C | -0.5271  | 0.72147  | -0.00157 |
| N | -1.63175 | 1.404808 | -0.00224 |
| C | -2.80972 | 0.714181 | -0.00088 |
| C | -2.80972 | -0.71417 | 0.000991 |
| C | 6.615609 | -0.70689 | 0.009671 |
| C | 5.41973  | -1.42676 | 0.019731 |
| C | 5.419731 | 1.426743 | -0.0197  |
| C | 6.615611 | 0.706869 | -0.00975 |
| C | 5.437849 | 2.847893 | -0.04239 |
| C | 5.462511 | 4.050756 | -0.0729  |
| H | 5.479646 | 5.112578 | -0.09023 |
| C | 5.437851 | -2.84792 | 0.04243  |
| C | 5.462513 | -4.05078 | 0.07295  |
| H | 5.479655 | -5.1126  | 0.090338 |
| O | 7.806144 | 1.375386 | 0.026392 |

|    |          |          |          |
|----|----------|----------|----------|
| O  | 7.806128 | -1.37542 | -0.02663 |
| C  | 8.519767 | 1.422807 | -1.22148 |
| H  | 9.435475 | 1.977282 | -1.02129 |
| H  | 8.762124 | 0.416058 | -1.56896 |
| H  | 7.931009 | 1.95285  | -1.97589 |
| C  | 8.520029 | -1.42269 | 1.221098 |
| H  | 9.435884 | -1.97685 | 1.020669 |
| H  | 8.762153 | -0.41589 | 1.568584 |
| H  | 7.931598 | -1.953   | 1.975572 |
| N  | 3.0117   | -1.40634 | 0.00701  |
| C  | 1.907944 | -0.72048 | 0.003585 |
| C  | 1.907943 | 0.720466 | -0.00332 |
| N  | 3.0117   | 1.406328 | -0.00683 |
| C  | 4.187565 | 0.710466 | -0.00305 |
| C  | 4.187565 | -0.71048 | 0.003163 |
| N  | 0.689218 | 1.373937 | -0.00496 |
| N  | 0.689217 | -1.37395 | 0.005325 |
| H  | 0.69015  | -2.38637 | 0.008691 |
| H  | 0.690157 | 2.386367 | -0.00839 |
| Br | -4.06862 | -3.30834 | -0.02877 |
| Br | -4.06861 | 3.308348 | 0.028837 |

## 2.0 N6P-Br dimer coordinates

N6P-Br Hg dimer: 0 degrees

Electronic Energy (EE:) -13556.085340 Hartree

EE + Thermal Free Energy Correction: -13555.497569 Hartree

E (Thermal): 489.762 kcal/mol

Entropy (S): 407.587 cal/mol-kelvin

Imaginary Freq: 0

|   |          |          |          |
|---|----------|----------|----------|
| 0 | 1        |          |          |
| C | 7.180255 | -5.79034 | 0.601271 |
| C | 7.824736 | -4.58459 | 0.382311 |
| C | 5.032704 | -4.65181 | 0.697761 |
| C | 5.766826 | -5.82397 | 0.763803 |
| O | 5.155687 | -7.0307  | 0.933062 |
| O | 7.880807 | -6.95412 | 0.716383 |
| C | 5.243033 | -7.58144 | 2.260161 |
| H | 4.716856 | -8.53399 | 2.22204  |
| H | 6.285183 | -7.74174 | 2.544249 |

|    |          |          |          |
|----|----------|----------|----------|
| H  | 4.749674 | -6.92101 | 2.978804 |
| C  | 7.843703 | -7.8092  | -0.441   |
| H  | 8.437487 | -8.68475 | -0.18303 |
| H  | 6.818218 | -8.10757 | -0.6685  |
| H  | 8.293068 | -7.30436 | -1.30082 |
| N  | 7.735481 | -2.18952 | 0.105647 |
| C  | 7.014803 | -1.11052 | 0.045663 |
| C  | 5.580431 | -1.1464  | 0.196945 |
| N  | 4.942253 | -2.2593  | 0.400068 |
| C  | 5.672698 | -3.41103 | 0.467583 |
| C  | 7.092836 | -3.37539 | 0.318572 |
| C  | 6.735678 | 5.976424 | -0.79999 |
| C  | 7.495788 | 4.807831 | -0.72631 |
| C  | 4.654562 | 4.737132 | -0.44864 |
| C  | 5.329597 | 5.941624 | -0.66282 |
| C  | 3.242313 | 4.721553 | -0.31394 |
| C  | 8.909383 | 4.861485 | -0.86352 |
| C  | 10.10691 | 4.917679 | -0.97002 |
| H  | 11.16312 | 4.961461 | -1.07281 |
| O  | 4.627384 | 7.11319  | -0.69472 |
| O  | 7.352977 | 7.168728 | -1.05251 |
| C  | 4.424157 | 7.66792  | -2.00618 |
| H  | 3.865045 | 8.590713 | -1.85798 |
| H  | 5.379994 | 7.885134 | -2.48793 |
| H  | 3.836124 | 6.980966 | -2.62183 |
| C  | 7.517332 | 8.026408 | 0.090003 |
| H  | 8.016132 | 8.922049 | -0.2776  |
| H  | 6.548618 | 8.289742 | 0.520647 |
| H  | 8.147243 | 7.541794 | 0.84173  |
| N  | 7.562811 | 2.417539 | -0.44743 |
| C  | 6.922323 | 1.305476 | -0.24382 |
| C  | 5.489636 | 1.269727 | -0.09353 |
| N  | 4.76717  | 2.348446 | -0.15305 |
| C  | 5.414623 | 3.532689 | -0.36544 |
| C  | 6.827251 | 3.566868 | -0.51552 |
| N  | 4.885923 | 0.044159 | 0.120109 |
| N  | 7.617787 | 0.112686 | -0.16711 |
| H  | 8.624276 | 0.139122 | -0.27339 |
| H  | 3.879408 | 0.018465 | 0.226115 |
| Br | 9.716181 | -4.56338 | 0.168888 |
| Br | 3.143479 | -4.72115 | 0.917615 |

|    |          |          |          |
|----|----------|----------|----------|
| C  | -3.24251 | 4.721557 | 0.3138   |
| C  | -4.65475 | 4.737066 | 0.448604 |
| C  | -5.32983 | 5.941523 | 0.66284  |
| C  | -5.41476 | 3.53259  | 0.365425 |
| C  | -6.7359  | 5.976258 | 0.80011  |
| O  | -4.62767 | 7.113127 | 0.694697 |
| N  | -4.76727 | 2.348382 | 0.152969 |
| C  | -6.82738 | 3.566702 | 0.515615 |
| C  | -7.49596 | 4.807629 | 0.72648  |
| O  | -7.35323 | 7.168528 | 1.052691 |
| C  | -4.42434 | 7.66782  | 2.006159 |
| C  | -5.48969 | 1.26963  | 0.09348  |
| N  | -7.56289 | 2.41734  | 0.447557 |
| C  | -8.90955 | 4.861217 | 0.863782 |
| C  | -7.51768 | 8.026234 | -0.08979 |
| H  | -3.86528 | 8.590645 | 1.857934 |
| H  | -5.38013 | 7.884972 | 2.488016 |
| H  | -3.83621 | 6.980872 | 2.621724 |
| C  | -6.92237 | 1.30531  | 0.243874 |
| N  | -4.88594 | 0.044093 | -0.12022 |
| C  | -10.1071 | 4.917357 | 0.970359 |
| H  | -8.01651 | 8.921841 | 0.277866 |
| H  | -6.549   | 8.289624 | -0.52047 |
| H  | -8.14761 | 7.541611 | -0.8415  |
| N  | -7.61778 | 0.11249  | 0.167194 |
| C  | -5.58039 | -1.1465  | -0.197   |
| H  | -3.87943 | 0.018445 | -0.22629 |
| C  | -7.01476 | -1.11069 | -0.04562 |
| H  | -8.62427 | 0.138877 | 0.273561 |
| N  | -4.94218 | -2.25937 | -0.40017 |
| N  | -7.73539 | -2.18972 | -0.10555 |
| C  | -5.67257 | -3.41113 | -0.46764 |
| C  | -7.0927  | -3.37556 | -0.31852 |
| C  | -5.03254 | -4.65188 | -0.69786 |
| C  | -7.82455 | -4.5848  | -0.38221 |
| C  | -5.76661 | -5.82408 | -0.76385 |
| Br | -3.14332 | -4.72113 | -0.91786 |
| C  | -7.18003 | -5.79052 | -0.60121 |
| Br | -9.71598 | -4.56368 | -0.16864 |
| O  | -5.15542 | -7.03077 | -0.93316 |
| O  | -7.88053 | -6.95433 | -0.71627 |

|    |          |          |          |
|----|----------|----------|----------|
| C  | -5.24286 | -7.58154 | -2.26024 |
| C  | -7.8433  | -7.8094  | 0.441115 |
| H  | -4.71662 | -8.53406 | -2.22216 |
| H  | -6.28502 | -7.74189 | -2.54424 |
| H  | -4.7496  | -6.92108 | -2.97894 |
| H  | -8.43707 | -8.68498 | 0.183196 |
| H  | -6.81779 | -8.10773 | 0.668539 |
| H  | -8.29262 | -7.30458 | 1.300968 |
| H  | -11.1633 | 4.961069 | 1.073202 |
| C  | 2.031671 | 4.719161 | -0.20168 |
| Hg | -0.0001  | 4.716118 | -0.0001  |
| C  | -2.03187 | 4.719182 | 0.201502 |

N6P-Br Hg dimer: 90 degrees

Electronic Energy (EE:): -13556.085282 Hartree

EE + Thermal Free Energy Correction: -13555.498444 Hartree

E (Thermal): 489.757 kcal/mol

Entropy (S): 409.537 cal/mol-kelvin

Imaginary Freq: 0

|   |          |          |          |
|---|----------|----------|----------|
| 0 | 1        |          |          |
| C | 9.922051 | -4.20847 | -2.01327 |
| C | 9.997024 | -3.33443 | -0.942   |
| C | 7.700725 | -3.38271 | -2.56145 |
| C | 8.757801 | -4.23535 | -2.83127 |
| O | 8.730495 | -5.07491 | -3.90495 |
| O | 10.92823 | -5.08988 | -2.27623 |
| C | 8.457213 | -6.45454 | -3.59804 |
| H | 8.477589 | -6.98081 | -4.55109 |
| H | 9.220399 | -6.8607  | -2.93097 |
| H | 7.465665 | -6.55438 | -3.14757 |
| C | 11.78403 | -4.73319 | -3.37739 |
| H | 12.51781 | -5.53394 | -3.45517 |
| H | 11.21137 | -4.6604  | -4.3043  |
| H | 12.29546 | -3.78884 | -3.17071 |
| N | 9.003126 | -1.60496 | 0.415228 |
| C | 7.994323 | -0.81715 | 0.636348 |
| C | 6.820777 | -0.83277 | -0.20299 |
| N | 6.717388 | -1.63626 | -1.21833 |
| C | 7.761945 | -2.47715 | -1.47601 |
| C | 8.924004 | -2.46112 | -0.64561 |

|    |          |          |          |
|----|----------|----------|----------|
| C  | 5.052234 | 4.32141  | 4.631055 |
| C  | 6.124657 | 3.46257  | 4.383964 |
| C  | 3.813072 | 3.453397 | 2.707226 |
| C  | 3.908503 | 4.317669 | 3.800805 |
| C  | 2.657687 | 3.462572 | 1.883825 |
| C  | 7.266164 | 3.478026 | 5.230548 |
| C  | 8.224192 | 3.490326 | 5.958967 |
| H  | 9.075537 | 3.504317 | 6.593848 |
| O  | 2.86133  | 5.141105 | 4.103816 |
| O  | 5.124007 | 5.211504 | 5.664991 |
| C  | 3.046269 | 6.522035 | 3.746745 |
| H  | 2.138968 | 7.036596 | 4.060035 |
| H  | 3.910916 | 6.94422  | 4.263458 |
| H  | 3.165613 | 6.621198 | 2.66381  |
| C  | 4.368467 | 4.851837 | 6.834628 |
| H  | 4.528279 | 5.654943 | 7.552657 |
| H  | 3.304979 | 4.768459 | 6.599605 |
| H  | 4.739369 | 3.911242 | 7.252223 |
| N  | 7.099083 | 1.737113 | 3.016559 |
| C  | 6.994377 | 0.935652 | 1.999175 |
| C  | 5.823463 | 0.921874 | 1.159549 |
| N  | 4.813873 | 1.710436 | 1.378366 |
| C  | 4.896466 | 2.563813 | 2.442101 |
| C  | 6.051859 | 2.577453 | 3.269191 |
| N  | 5.792021 | 0.037213 | 0.097131 |
| N  | 8.025625 | 0.065034 | 1.697341 |
| H  | 8.848182 | 0.076241 | 2.28751  |
| H  | 4.968848 | 0.026313 | -0.49217 |
| Br | 11.56364 | -3.31676 | 0.139067 |
| Br | 6.153985 | -3.43543 | -3.66959 |
| C  | -2.65753 | 3.462357 | -1.88394 |
| C  | -3.81295 | 3.453264 | -2.70729 |
| C  | -3.90837 | 4.317546 | -3.80086 |
| C  | -4.89639 | 2.563742 | -2.44214 |
| C  | -5.05211 | 4.321333 | -4.6311  |
| O  | -2.86118 | 5.140958 | -4.10388 |
| N  | -4.81383 | 1.710376 | -1.37839 |
| C  | -6.0518  | 2.577432 | -3.26921 |
| C  | -6.12458 | 3.462548 | -4.38398 |
| O  | -5.12387 | 5.211416 | -5.66504 |
| C  | -3.04605 | 6.521868 | -3.7467  |

|    |          |          |          |
|----|----------|----------|----------|
| C  | -5.82345 | 0.921861 | -1.15955 |
| N  | -7.09906 | 1.737141 | -3.01655 |
| C  | -7.26609 | 3.478052 | -5.23055 |
| C  | -4.36835 | 4.851726 | -6.83468 |
| H  | -2.13876 | 7.036431 | -4.06003 |
| H  | -3.91073 | 6.944113 | -4.26331 |
| H  | -3.16529 | 6.620959 | -2.66374 |
| C  | -6.99437 | 0.93568  | -1.99916 |
| N  | -5.79203 | 0.037213 | -0.09712 |
| C  | -8.22413 | 3.49039  | -5.95896 |
| H  | -4.52819 | 5.654803 | -7.55273 |
| H  | -3.30485 | 4.768374 | -6.59968 |
| H  | -4.73924 | 3.911109 | -7.25224 |
| N  | -8.02565 | 0.065108 | -1.69731 |
| C  | -6.82082 | -0.83273 | 0.20302  |
| H  | -4.96885 | 0.026282 | 0.492163 |
| C  | -7.99437 | -0.81707 | -0.63632 |
| H  | -8.84821 | 0.076334 | -2.28748 |
| N  | -6.71746 | -1.63621 | 1.218362 |
| N  | -9.00319 | -1.60487 | -0.4152  |
| C  | -7.76204 | -2.47707 | 1.47605  |
| C  | -8.92409 | -2.46101 | 0.645646 |
| C  | -7.70084 | -3.38262 | 2.561497 |
| C  | -9.99714 | -3.3343  | 0.942044 |
| C  | -8.75794 | -4.23523 | 2.831325 |
| Br | -6.1541  | -3.43538 | 3.669637 |
| C  | -9.92219 | -4.20833 | 2.013327 |
| Br | -11.5637 | -3.31661 | -0.13904 |
| O  | -8.73066 | -5.0748  | 3.905005 |
| O  | -10.9284 | -5.0897  | 2.276273 |
| C  | -8.4574  | -6.45443 | 3.598054 |
| C  | -11.7841 | -4.73308 | 3.377544 |
| H  | -8.47776 | -6.98072 | 4.551098 |
| H  | -9.22061 | -6.86056 | 2.930999 |
| H  | -7.46587 | -6.55427 | 3.147559 |
| H  | -12.5179 | -5.53379 | 3.455271 |
| H  | -11.2114 | -4.66045 | 4.304424 |
| H  | -12.2955 | -3.78868 | 3.171019 |
| H  | -9.07545 | 3.504352 | -6.59387 |
| C  | 1.665918 | 3.475918 | 1.180678 |
| Hg | 0.000075 | 3.477726 | -5.3E-05 |



|   |          |          |         |
|---|----------|----------|---------|
| C | -1.66575 | 3.475762 | -1.1808 |
|---|----------|----------|---------|

N6P-Br Hg dimer: 180 degrees

Electronic Energy (EE:) -13556.085424 Hartree

EE + Thermal Free Energy Correction: -13555.498501 Hartree

E (Thermal): 489.751 kcal/mol

Entropy (S): 409.337 cal/mol-kelvin

Imaginary Freq: 0

|   |          |          |          |
|---|----------|----------|----------|
| 0 | 1        |          |          |
| C | -12.5899 | 1.513291 | -0.54915 |
| C | -12.1066 | 0.21965  | -0.44812 |
| C | -10.3272 | 2.394222 | -0.40778 |
| C | -11.6891 | 2.614718 | -0.52544 |
| O | -12.1897 | 3.874268 | -0.67133 |
| O | -13.9282 | 1.762707 | -0.62062 |
| C | -12.7916 | 4.435765 | 0.509666 |
| H | -13.1427 | 5.425688 | 0.222491 |
| H | -13.6322 | 3.823947 | 0.843443 |
| H | -12.0487 | 4.529444 | 1.306796 |
| C | -14.4207 | 2.099127 | -1.9308  |
| H | -15.489  | 2.272789 | -1.81127 |
| H | -13.9354 | 3.002484 | -2.30608 |
| H | -14.2618 | 1.26651  | -2.62185 |
| N | -10.2501 | -1.30353 | -0.21534 |
| C | -8.96659 | -1.47284 | -0.1094  |
| C | -8.05196 | -0.35679 | -0.10113 |
| N | -8.46908 | 0.869521 | -0.19838 |
| C | -9.8137  | 1.079428 | -0.3107  |
| C | -10.7191 | -0.02528 | -0.31921 |
| C | -3.45982 | -5.97295 | 0.556897 |
| C | -4.83724 | -5.77322 | 0.449145 |
| C | -3.02337 | -3.5676  | 0.438247 |
| C | -2.56182 | -4.88154 | 0.550828 |
| C | -2.10798 | -2.48374 | 0.432776 |
| C | -5.72605 | -6.88221 | 0.459425 |
| C | -6.47209 | -7.82644 | 0.479829 |
| H | -7.13333 | -8.65756 | 0.48812  |
| O | -1.22503 | -5.11641 | 0.705224 |

|    |          |          |          |
|----|----------|----------|----------|
| O  | -2.96538 | -7.24453 | 0.625315 |
| C  | -0.54997 | -5.60431 | -0.4676  |
| H  | 0.490028 | -5.74641 | -0.17734 |
| H  | -0.97827 | -6.55415 | -0.79498 |
| H  | -0.60562 | -4.86532 | -1.2723  |
| C  | -2.55344 | -7.67115 | 1.935543 |
| H  | -2.18713 | -8.68988 | 1.816905 |
| H  | -1.75613 | -7.031   | 2.319808 |
| H  | -3.4056  | -7.66848 | 2.621479 |
| N  | -6.67597 | -4.23678 | 0.214986 |
| C  | -7.09103 | -3.00946 | 0.11609  |
| C  | -6.17758 | -1.89531 | 0.122191 |
| N  | -4.89307 | -2.06254 | 0.227092 |
| C  | -4.42831 | -3.3429  | 0.333236 |
| C  | -5.32971 | -4.44138 | 0.326147 |
| N  | -6.70198 | -0.62021 | 0.013399 |
| N  | -8.44369 | -2.74537 | -4.2E-05 |
| H  | -9.0845  | -3.52919 | -0.00499 |
| H  | -6.06044 | 0.162923 | 0.019469 |
| Br | -13.3303 | -1.23795 | -0.48102 |
| Br | -9.14089 | 3.882836 | -0.37925 |
| C  | 2.107865 | 2.483335 | 0.432712 |
| C  | 3.023182 | 3.567256 | 0.438237 |
| C  | 2.561528 | 4.881155 | 0.550823 |
| C  | 4.428148 | 3.342664 | 0.333247 |
| C  | 3.459453 | 5.972639 | 0.556938 |
| O  | 1.224718 | 5.115928 | 0.705182 |
| N  | 4.893007 | 2.062341 | 0.227074 |
| C  | 5.329465 | 4.441219 | 0.326205 |
| C  | 4.836889 | 5.773021 | 0.449221 |
| O  | 2.964907 | 7.244174 | 0.62536  |
| C  | 0.549662 | 5.603792 | -0.46766 |
| C  | 6.177531 | 1.895211 | 0.122193 |
| N  | 6.675738 | 4.236717 | 0.215068 |
| C  | 5.725607 | 6.882079 | 0.459543 |
| C  | 2.552931 | 7.670761 | 1.935591 |
| H  | -0.49036 | 5.745802 | -0.17744 |
| H  | 0.977889 | 6.553668 | -0.795   |
| H  | 0.605399 | 4.864821 | -1.27236 |
| C  | 7.090891 | 3.009438 | 0.116147 |
| N  | 6.702025 | 0.620158 | 0.013368 |

|    |          |          |          |
|----|----------|----------|----------|
| C  | 6.47158  | 7.82636  | 0.479975 |
| H  | 2.186546 | 8.689459 | 1.816959 |
| H  | 1.75567  | 7.030547 | 2.319848 |
| H  | 3.405091 | 7.668148 | 2.621528 |
| N  | 8.44357  | 2.745455 | 0.000042 |
| C  | 8.052034 | 0.356847 | -0.10114 |
| H  | 6.06055  | -0.16303 | 0.0194   |
| C  | 8.96657  | 1.47297  | -0.10935 |
| H  | 9.084324 | 3.529318 | -0.00487 |
| N  | 8.46925  | -0.86943 | -0.19843 |
| N  | 10.25009 | 1.303761 | -0.21527 |
| C  | 9.813887 | -1.07923 | -0.31073 |
| C  | 10.71918 | 0.025544 | -0.31918 |
| C  | 10.32747 | -2.39398 | -0.40784 |
| C  | 12.10676 | -0.21927 | -0.44807 |
| C  | 11.68937 | -2.61437 | -0.52547 |
| Br | 9.141297 | -3.88269 | -0.37938 |
| C  | 12.59016 | -1.51287 | -0.54913 |
| Br | 13.33035 | 1.238429 | -0.48089 |
| O  | 12.19015 | -3.87388 | -0.6714  |
| O  | 13.92846 | -1.76218 | -0.6206  |
| C  | 12.79206 | -4.43535 | 0.509585 |
| C  | 14.42101 | -2.09855 | -1.93078 |
| H  | 13.14321 | -5.42526 | 0.222396 |
| H  | 13.63267 | -3.8235  | 0.843342 |
| H  | 12.0492  | -4.52907 | 1.306734 |
| H  | 15.48931 | -2.2721  | -1.81124 |
| H  | 13.93582 | -3.00196 | -2.30605 |
| H  | 14.26201 | -1.26596 | -2.62183 |
| H  | 7.132743 | 8.657538 | 0.488199 |
| C  | -1.31769 | -1.55983 | 0.426244 |
| Hg | -1.1E-05 | -0.00024 | 0.426407 |
| C  | 1.317627 | 1.559382 | 0.42619  |

### 3.0 N6P-Ph coordinates

Electronic Energy (EE:): -2169.596377 Hartree  
 EE + Thermal Free Energy Correction: -2169.115848 Hartree  
 E (Thermal): 382.579 kcal/mol  
 Entropy (S): 273.804 cal/mol-kelvin  
 Imaginary Freq: 0

|   |          |          |          |
|---|----------|----------|----------|
| 0 | 1        |          |          |
| C | 4.793654 | -0.70508 | 0.002504 |
| C | 3.596919 | -1.43029 | 0.001949 |
| C | 3.596894 | 1.430358 | -0.00195 |
| C | 4.793642 | 0.705163 | -0.00249 |
| O | 5.985391 | 1.375554 | 0.034689 |
| O | 5.985418 | -1.37545 | -0.03465 |
| C | 6.695573 | 1.422156 | -1.21459 |
| H | 7.612855 | 1.975772 | -1.01785 |
| H | 6.936744 | 0.41534  | -1.56275 |
| H | 6.105329 | 1.951779 | -1.96835 |
| C | 6.695561 | -1.42206 | 1.214645 |
| H | 7.612856 | -1.97566 | 1.017931 |
| H | 6.936709 | -0.41525 | 1.562832 |
| H | 6.1053   | -1.9517  | 1.968379 |
| N | 1.187894 | -1.406   | -0.01197 |
| C | 0.083455 | -0.7204  | -0.00671 |
| C | 0.083442 | 0.720399 | 0.006687 |
| N | 1.187869 | 1.406024 | 0.011955 |
| C | 2.36413  | 0.710254 | 0.006011 |
| C | 2.364142 | -0.71021 | -0.00602 |
| C | -7.062   | -0.70643 | -0.01545 |
| C | -5.86559 | -1.42594 | -0.03165 |
| C | -5.86561 | 1.425834 | 0.031659 |
| C | -7.06201 | 0.706305 | 0.015463 |
| C | -5.88441 | 2.846869 | 0.06642  |
| C | -5.9111  | 4.049429 | 0.107475 |
| H | -5.93045 | 5.110948 | 0.133968 |
| C | -5.88436 | -2.84697 | -0.06641 |
| C | -5.911   | -4.04953 | -0.10748 |
| H | -5.92998 | -5.11105 | -0.13419 |
| O | -8.25299 | 1.37553  | -0.01533 |
| O | -8.25296 | -1.37568 | 0.01535  |
| C | -8.96424 | 1.414503 | 1.233749 |
| H | -9.88032 | 1.970578 | 1.039322 |
| H | -9.20637 | 0.405394 | 1.574674 |
| H | -8.3742  | 1.938978 | 1.991126 |
| C | -8.96423 | -1.41465 | -1.23372 |
| H | -9.8803  | -1.97073 | -1.03928 |
| H | -9.20638 | -0.40554 | -1.57463 |
| H | -8.3742  | -1.93912 | -1.9911  |

|   |          |          |          |
|---|----------|----------|----------|
| N | -3.45741 | -1.40681 | -0.01828 |
| C | -2.35318 | -0.72111 | -0.0091  |
| C | -2.3532  | 0.721066 | 0.009079 |
| N | -3.45744 | 1.406755 | 0.018276 |
| C | -4.63341 | 0.710272 | 0.009054 |
| C | -4.6334  | -0.71035 | -0.00905 |
| N | -1.13544 | 1.373004 | 0.015298 |
| N | -1.13541 | -1.37302 | -0.01533 |
| H | -1.13617 | -2.38505 | -0.02786 |
| H | -1.13621 | 2.385035 | 0.027836 |
| C | 3.616261 | 2.844396 | -0.00316 |
| C | 3.616312 | -2.84433 | 0.003166 |
| C | 3.641693 | -4.05431 | 0.011665 |
| C | 3.641611 | 4.054372 | -0.01166 |
| C | 3.664341 | 5.47508  | -0.01476 |
| C | 2.470778 | 6.209062 | -0.14635 |
| C | 4.879298 | 6.173605 | 0.113841 |
| C | 2.496434 | 7.597986 | -0.14968 |
| H | 1.534228 | 5.673972 | -0.24504 |
| C | 4.895029 | 7.56279  | 0.109667 |
| H | 5.799637 | 5.612174 | 0.219442 |
| C | 3.706275 | 8.280064 | -0.02223 |
| H | 1.569715 | 8.15138  | -0.25198 |
| H | 5.837737 | 8.088753 | 0.21059  |
| H | 3.722482 | 9.363957 | -0.02498 |
| C | 3.664488 | -5.47502 | 0.014752 |
| C | 2.470954 | -6.20905 | 0.146307 |
| C | 4.879479 | -6.17349 | -0.11383 |
| C | 2.496673 | -7.59798 | 0.149626 |
| H | 1.534378 | -5.67401 | 0.244975 |
| C | 4.895272 | -7.56267 | -0.10966 |
| H | 5.799796 | -5.61202 | -0.2194  |
| C | 3.706547 | -8.28    | 0.022192 |
| H | 1.569976 | -8.15141 | 0.251898 |
| H | 5.838007 | -8.08859 | -0.21057 |
| H | 3.722803 | -9.36389 | 0.024934 |

#### 4.0 N6P-Ph dimer coordinates

N6P- Ph Hg dimer: 20 degrees

Electronic Energy (EE:) -4491.069887 Hartree

EE + Thermal Free Energy Correction: -4490.114462 Hartree  
 E (Thermal): 755.831 kcal/mol  
 Entropy (S): 526.196 cal/mol-kelvin  
 Imaginary Freq: 0

|   |          |          |          |
|---|----------|----------|----------|
| 0 | 1        |          |          |
| C | -9.6061  | -3.97467 | 2.582794 |
| C | -9.80361 | -3.0821  | 1.523283 |
| C | -7.34743 | -3.12312 | 2.989528 |
| C | -8.39432 | -3.99666 | 3.303922 |
| O | -8.25645 | -4.85994 | 4.355987 |
| O | -10.5901 | -4.87084 | 2.89845  |
| C | -7.99879 | -6.22638 | 3.990501 |
| H | -7.92342 | -6.77837 | 4.926569 |
| H | -8.8158  | -6.62824 | 3.387063 |
| H | -7.05306 | -6.30273 | 3.445736 |
| C | -11.3466 | -4.552   | 4.078798 |
| H | -12.0738 | -5.35463 | 4.195034 |
| H | -10.698  | -4.50841 | 4.956564 |
| H | -11.8717 | -3.60098 | 3.948766 |
| N | -8.9226  | -1.31357 | 0.144396 |
| C | -7.94379 | -0.50483 | -0.13455 |
| C | -6.71202 | -0.51675 | 0.612536 |
| N | -6.5179  | -1.33719 | 1.601888 |
| C | -7.53073 | -2.19883 | 1.9169   |
| C | -8.74528 | -2.18735 | 1.180256 |
| C | -5.38701 | 4.757223 | -4.23774 |
| C | -6.42475 | 3.875709 | -3.92812 |
| C | -3.99563 | 3.874135 | -2.42926 |
| C | -4.18493 | 4.756814 | -3.49599 |
| C | -2.78279 | 3.887891 | -1.69296 |
| C | -1.74322 | 3.904835 | -1.06254 |
| C | -7.62631 | 3.888472 | -4.68739 |
| C | -8.63537 | 3.899692 | -5.34343 |
| H | -9.53111 | 3.912854 | -5.91385 |
| O | -3.17519 | 5.602863 | -3.86012 |
| O | -5.55009 | 5.665715 | -5.24575 |
| C | -3.35237 | 6.972544 | -3.45961 |
| H | -2.47868 | 7.50826  | -3.82828 |
| H | -4.25938 | 7.391748 | -3.90073 |
| H | -3.39159 | 7.047225 | -2.36883 |
| C | -4.88107 | 5.339039 | -6.47567 |

|    |          |          |          |
|----|----------|----------|----------|
| H  | -5.10613 | 6.152328 | -7.16426 |
| H  | -3.80162 | 5.267876 | -6.32381 |
| H  | -5.26919 | 4.400448 | -6.88222 |
| N  | -7.26912 | 2.109154 | -2.52652 |
| C  | -7.0768  | 1.290742 | -1.53527 |
| C  | -5.84487 | 1.280772 | -0.78528 |
| N  | -4.8665  | 2.09017  | -1.06378 |
| C  | -5.04213 | 2.961843 | -2.10157 |
| C  | -6.25595 | 2.971379 | -2.8398  |
| N  | -5.72106 | 0.377832 | 0.252455 |
| N  | -8.06765 | 0.398612 | -1.17391 |
| H  | -8.93164 | 0.406184 | -1.70099 |
| H  | -4.85713 | 0.370932 | 0.779641 |
| C  | -6.14006 | -3.15606 | 3.725003 |
| C  | -11.0242 | -3.07668 | 0.809202 |
| C  | -12.0745 | -3.07326 | 0.207853 |
| C  | -5.10583 | -3.19306 | 4.352527 |
| C  | -3.89051 | -3.22504 | 5.088079 |
| C  | -2.79716 | -2.43014 | 4.696329 |
| C  | -3.75774 | -4.05051 | 6.220087 |
| C  | -1.60977 | -2.46359 | 5.416572 |
| H  | -2.8967  | -1.79365 | 3.825591 |
| C  | -2.56633 | -4.07731 | 6.934219 |
| H  | -4.59837 | -4.66082 | 6.527129 |
| C  | -1.48897 | -3.28601 | 6.536517 |
| H  | -0.77508 | -1.84631 | 5.103889 |
| H  | -2.47732 | -4.71708 | 7.805044 |
| H  | -0.56093 | -3.30956 | 7.096223 |
| C  | -13.3027 | -3.06834 | -0.50673 |
| C  | -13.5543 | -2.09268 | -1.48928 |
| C  | -14.2888 | -4.03789 | -0.24565 |
| C  | -14.7564 | -2.09004 | -2.18565 |
| H  | -12.7969 | -1.34555 | -1.69255 |
| C  | -15.4878 | -4.02733 | -0.94728 |
| H  | -14.0971 | -4.79296 | 0.507027 |
| C  | -15.727  | -3.05522 | -1.91827 |
| H  | -14.9376 | -1.33263 | -2.93999 |
| H  | -16.2388 | -4.78057 | -0.7371  |
| H  | -16.6638 | -3.05023 | -2.46375 |
| Hg | 0.000012 | 3.909835 | 0.000048 |
| C  | 1.743245 | 3.904851 | 1.062627 |

|   |          |          |          |
|---|----------|----------|----------|
| C | 2.782817 | 3.887896 | 1.693045 |
| C | 3.995663 | 3.874114 | 2.429349 |
| C | 4.184968 | 4.756762 | 3.4961   |
| C | 5.042155 | 2.961832 | 2.101627 |
| C | 5.387043 | 4.757151 | 4.23784  |
| O | 3.175224 | 5.602799 | 3.860258 |
| N | 4.866525 | 2.090189 | 1.063805 |
| C | 6.255983 | 2.971348 | 2.839848 |
| C | 6.424785 | 3.875647 | 3.928197 |
| O | 5.550125 | 5.665614 | 5.245884 |
| C | 3.352404 | 6.972494 | 3.459792 |
| C | 5.844897 | 1.280801 | 0.78528  |
| N | 7.269154 | 2.109133 | 2.526541 |
| C | 7.626351 | 3.88839  | 4.687455 |
| C | 4.881133 | 5.338889 | 6.475802 |
| H | 2.478714 | 7.508197 | 3.828489 |
| H | 4.259415 | 7.391682 | 3.90092  |
| H | 3.391614 | 7.047212 | 2.369019 |
| C | 7.076834 | 1.29075  | 1.535269 |
| N | 5.721088 | 0.377893 | -0.25248 |
| C | 8.635413 | 3.899594 | 5.34349  |
| H | 5.10619  | 6.152159 | 7.164415 |
| H | 3.801675 | 5.267718 | 6.323952 |
| H | 5.269267 | 4.400289 | 6.882308 |
| N | 8.067679 | 0.398633 | 1.173872 |
| C | 6.712031 | -0.5167  | -0.61257 |
| H | 4.857149 | 0.371    | -0.77966 |
| C | 7.943803 | -0.5048  | 0.134511 |
| H | 8.931666 | 0.406178 | 1.700959 |
| N | 6.517901 | -1.33712 | -1.60193 |
| N | 8.922598 | -1.31356 | -0.14444 |
| C | 7.530718 | -2.19878 | -1.91695 |
| C | 8.745259 | -2.18732 | -1.18031 |
| C | 7.347397 | -3.12306 | -2.98959 |
| C | 9.803575 | -3.0821  | -1.52334 |
| C | 8.394278 | -3.99661 | -3.30399 |
| C | 6.140033 | -3.15596 | -3.72507 |
| C | 9.606056 | -3.97465 | -2.58285 |
| C | 11.02419 | -3.07671 | -0.80925 |
| O | 8.256402 | -4.85987 | -4.35607 |
| C | 5.105803 | -3.19292 | -4.3526  |



|   |          |          |          |
|---|----------|----------|----------|
| O | 10.59    | -4.87085 | -2.89851 |
| C | 12.07449 | -3.07331 | -0.2079  |
| C | 7.998678 | -6.22631 | -3.9906  |
| C | 3.890493 | -3.22485 | -5.08816 |
| C | 11.34655 | -4.552   | -4.07883 |
| C | 13.30263 | -3.06843 | 0.506672 |
| H | 7.92332  | -6.77829 | -4.92667 |
| H | 8.815648 | -6.6282  | -3.38713 |
| H | 7.052915 | -6.30262 | -3.44588 |
| C | 2.797212 | -2.42983 | -4.69647 |
| C | 3.757651 | -4.05038 | -6.22011 |
| H | 12.07377 | -5.35465 | -4.19508 |
| H | 10.69798 | -4.50836 | -4.95661 |
| H | 11.87166 | -3.601   | -3.94876 |
| C | 13.55436 | -2.09275 | 1.489195 |
| C | 14.2887  | -4.03802 | 0.245604 |
| C | 1.609815 | -2.46321 | -5.41672 |
| H | 2.896806 | -1.79328 | -3.82578 |
| C | 2.566241 | -4.07713 | -6.93425 |
| H | 4.598223 | -4.6608  | -6.52711 |
| C | 14.75639 | -2.09014 | 2.185553 |
| H | 12.79697 | -1.34558 | 1.692447 |
| C | 15.48776 | -4.0275  | 0.947224 |
| H | 14.09698 | -4.79311 | -0.50705 |
| C | 1.488952 | -3.2857  | -6.5366  |
| H | 0.775183 | -1.84584 | -5.10408 |
| H | 2.477173 | -4.71695 | -7.80503 |
| C | 15.72698 | -3.05538 | 1.918186 |
| H | 14.93772 | -1.33272 | 2.939864 |
| H | 16.23873 | -4.78078 | 0.737056 |
| H | 0.560911 | -3.30921 | -7.09631 |
| H | 16.66376 | -3.05041 | 2.463662 |
| H | 9.531146 | 3.912739 | 5.913923 |

N6P-Ph Hg dimer: 90 degrees

Electronic Energy (EE:): -4491.069965 Hartree

EE + Thermal Free Energy Correction: -4490.114369 Hartree

E (Thermal): 755.827 kcal/mol

Entropy (S): 525.824 cal/mol-kelvin

Imaginary Freq: 0

|   |          |          |          |
|---|----------|----------|----------|
| 0 | 1        |          |          |
| C | -12.2701 | -2.16069 | -1.20952 |
| C | -11.9203 | -0.83949 | -0.90904 |
| C | -9.94645 | -2.90699 | -1.02223 |
| C | -11.2967 | -3.17942 | -1.26844 |
| O | -11.6857 | -4.46432 | -1.53037 |
| O | -13.574  | -2.46275 | -1.4921  |
| C | -11.9842 | -4.73974 | -2.90964 |
| H | -12.279  | -5.78765 | -2.94939 |
| H | -12.8032 | -4.10968 | -3.2637  |
| H | -11.0952 | -4.58795 | -3.529   |
| C | -14.2852 | -3.13051 | -0.43595 |
| H | -15.2914 | -3.30473 | -0.81507 |
| H | -13.811  | -4.08312 | -0.1894  |
| H | -14.3359 | -2.49237 | 0.451322 |
| N | -10.1903 | 0.749123 | -0.37163 |
| C | -8.93373 | 0.987072 | -0.13827 |
| C | -7.9425  | -0.05772 | -0.17837 |
| N | -8.25473 | -1.28919 | -0.45342 |
| C | -9.56901 | -1.56741 | -0.70388 |
| C | -10.5469 | -0.53796 | -0.66181 |
| C | -3.84633 | 5.728914 | 1.503154 |
| C | -5.18958 | 5.457314 | 1.235258 |
| C | -3.23219 | 3.380104 | 1.200552 |
| C | -2.87746 | 4.701303 | 1.485845 |
| C | -2.24837 | 2.357785 | 1.193997 |
| C | -1.40423 | 1.482647 | 1.196275 |
| C | -6.15021 | 6.504763 | 1.254802 |
| C | -6.95402 | 7.400603 | 1.262866 |
| H | -7.66811 | 8.186577 | 1.278218 |
| O | -1.56601 | 5.016341 | 1.707717 |
| O | -3.4661  | 7.000163 | 1.831231 |
| C | -1.21659 | 5.237049 | 3.085209 |
| H | -0.15514 | 5.481091 | 3.090337 |
| H | -1.79112 | 6.066702 | 3.503041 |
| H | -1.38353 | 4.327492 | 3.669705 |
| C | -2.82212 | 7.735258 | 0.777048 |
| H | -2.58449 | 8.712533 | 1.195088 |
| H | -1.90539 | 7.234027 | 0.457928 |
| H | -3.50164 | 7.858138 | -0.0715  |

|    |          |          |          |
|----|----------|----------|----------|
| N  | -6.88861 | 3.840074 | 0.691052 |
| C  | -7.20238 | 2.608017 | 0.420975 |
| C  | -6.21138 | 1.560678 | 0.387716 |
| N  | -4.95617 | 1.79696  | 0.629328 |
| C  | -4.59852 | 3.084117 | 0.917099 |
| C  | -5.57474 | 4.115835 | 0.947487 |
| N  | -6.62806 | 0.27853  | 0.087616 |
| N  | -8.51601 | 2.271569 | 0.157199 |
| H  | -9.21093 | 3.006987 | 0.18197  |
| H  | -5.93277 | -0.45652 | 0.062854 |
| C  | -8.98306 | -3.94043 | -1.0835  |
| C  | -12.9096 | 0.169749 | -0.85882 |
| C  | -13.7633 | 1.026274 | -0.81083 |
| C  | -8.16048 | -4.826   | -1.14585 |
| C  | -7.18868 | -5.86059 | -1.21138 |
| C  | -5.81739 | -5.56025 | -1.1108  |
| C  | -7.57852 | -7.20248 | -1.37831 |
| C  | -4.86903 | -6.57324 | -1.17666 |
| H  | -5.51444 | -4.52825 | -0.9827  |
| C  | -6.62296 | -8.20894 | -1.44265 |
| H  | -8.63323 | -7.43808 | -1.45243 |
| C  | -5.2667  | -7.89973 | -1.34277 |
| H  | -3.81583 | -6.32772 | -1.09897 |
| H  | -6.93669 | -9.23887 | -1.57063 |
| H  | -4.52405 | -8.68777 | -1.39395 |
| C  | -14.7596 | 2.038105 | -0.75925 |
| C  | -14.435  | 3.340164 | -0.33507 |
| C  | -16.0875 | 1.757344 | -1.13112 |
| C  | -15.4114 | 4.327019 | -0.28495 |
| H  | -13.4136 | 3.559129 | -0.0488  |
| C  | -17.0572 | 2.750835 | -1.07788 |
| H  | -16.3404 | 0.757391 | -1.46213 |
| C  | -16.7246 | 4.037538 | -0.65507 |
| H  | -15.148  | 5.326038 | 0.043881 |
| H  | -18.0764 | 2.521578 | -1.36807 |
| H  | -17.4839 | 4.810168 | -0.61492 |
| Hg | -0.00012 | 0.000754 | 1.1942   |
| C  | 1.403935 | -1.4812  | 1.196373 |
| C  | 2.247943 | -2.35646 | 1.194233 |
| C  | 3.231551 | -3.37898 | 1.200957 |
| C  | 2.876521 | -4.70006 | 1.486397 |

|   |          |          |          |
|---|----------|----------|----------|
| C | 4.597964 | -3.08332 | 0.917539 |
| C | 3.845171 | -5.72788 | 1.503857 |
| O | 1.564998 | -5.01477 | 1.708252 |
| N | 4.955912 | -1.79627 | 0.629653 |
| C | 5.573951 | -4.11524 | 0.948081 |
| C | 5.188489 | -5.45661 | 1.23599  |
| O | 3.46465  | -6.99902 | 1.832038 |
| C | 1.215482 | -5.23537 | 3.085735 |
| C | 6.211186 | -1.56029 | 0.38808  |
| N | 6.887897 | -3.8398  | 0.691655 |
| C | 6.148888 | -6.50427 | 1.25568  |
| C | 2.820552 | -7.73407 | 0.777895 |
| H | 0.153955 | -5.4791  | 3.090839 |
| H | 1.789753 | -6.06519 | 3.503592 |
| H | 1.382679 | -4.32586 | 3.67023  |
| C | 7.201947 | -2.60784 | 0.421459 |
| N | 6.62816  | -0.27825 | 0.087895 |
| C | 6.952503 | -7.40028 | 1.263878 |
| H | 2.582795 | -8.7113  | 1.195976 |
| H | 1.90388  | -7.23273 | 0.458776 |
| H | 3.500032 | -7.85707 | -0.07066 |
| N | 8.515654 | -2.27172 | 0.157658 |
| C | 7.942679 | 0.057673 | -0.17809 |
| H | 5.933036 | 0.456946 | 0.06305  |
| C | 8.933667 | -0.98735 | -0.13793 |
| H | 9.210398 | -3.0073  | 0.182472 |
| N | 8.255206 | 1.289058 | -0.45322 |
| N | 10.19026 | -0.74972 | -0.37136 |
| C | 9.569544 | 1.566948 | -0.70372 |
| C | 10.54715 | 0.537257 | -0.66163 |
| C | 9.947303 | 2.906419 | -1.02214 |
| C | 11.92064 | 0.838439 | -0.90894 |
| C | 11.29756 | 3.178506 | -1.26843 |
| C | 8.984151 | 3.940085 | -1.08342 |
| C | 12.2708  | 2.159541 | -1.20951 |
| C | 12.90972 | -0.17104 | -0.85874 |
| O | 11.68691 | 4.463303 | -1.53046 |
| C | 8.161781 | 4.825844 | -1.14578 |
| O | 13.57473 | 2.461268 | -1.49215 |
| C | 13.76322 | -1.02777 | -0.81076 |
| C | 11.98542 | 4.738563 | -2.90975 |

|   |          |          |          |
|---|----------|----------|----------|
| C | 7.190155 | 5.860596 | -1.21141 |
| C | 14.28613 | 3.12889  | -0.43606 |
| C | 14.75925 | -2.03982 | -0.75926 |
| H | 12.28036 | 5.786424 | -2.94959 |
| H | 12.80429 | 4.10835  | -3.26377 |
| H | 11.09637 | 4.586849 | -3.5291  |
| C | 5.818814 | 5.560496 | -1.11077 |
| C | 7.580216 | 7.202405 | -1.37847 |
| H | 15.29241 | 3.302786 | -0.81521 |
| H | 13.81225 | 4.08166  | -0.18957 |
| H | 14.33662 | 2.490799 | 0.451262 |
| C | 14.43439 | -3.34184 | -0.33515 |
| C | 16.08726 | -1.75932 | -1.13114 |
| C | 4.87063  | 6.573641 | -1.17671 |
| H | 5.515689 | 4.528561 | -0.98255 |
| C | 6.624829 | 8.209013 | -1.44289 |
| H | 8.634965 | 7.437816 | -1.45263 |
| C | 15.41059 | -4.3289  | -0.28511 |
| H | 13.41293 | -3.5606  | -0.04887 |
| C | 17.05672 | -2.75303 | -1.07798 |
| H | 16.3403  | -0.75941 | -1.4621  |
| C | 5.268512 | 7.900049 | -1.34295 |
| H | 3.81738  | 6.328311 | -1.09896 |
| H | 6.938731 | 9.23888  | -1.57098 |
| C | 16.72382 | -4.03968 | -0.65524 |
| H | 15.147   | -5.32788 | 0.043668 |
| H | 18.07596 | -2.52397 | -1.36819 |
| H | 4.526003 | 8.688208 | -1.3942  |
| H | 17.48295 | -4.81248 | -0.61516 |
| H | 7.666388 | -8.18644 | 1.279381 |

N6P-Ph Hg dimer: 180 degrees

Electronic Energy (EE:): -4491.069965 Hartree

EE + Thermal Free Energy Correction: -4490.114368 Hartree

E (Thermal): 755.827 kcal/mol

Entropy (S): 525.820 cal/mol-kelvin

Imaginary Freq: 0

|   |          |          |          |
|---|----------|----------|----------|
| 0 | 1        |          |          |
| C | 12.27025 | 2.160154 | -1.20986 |
| C | 11.92027 | 0.83901  | -0.90928 |

|   |          |          |          |
|---|----------|----------|----------|
| C | 9.946661 | 2.906733 | -1.02245 |
| C | 11.29688 | 3.178995 | -1.26877 |
| O | 11.68607 | 4.46384  | -1.53078 |
| O | 13.57413 | 2.46206  | -1.49254 |
| C | 11.98454 | 4.739151 | -2.91008 |
| H | 12.27954 | 5.786993 | -2.94988 |
| H | 12.80335 | 4.108908 | -3.26417 |
| H | 11.09544 | 4.587525 | -3.52939 |
| C | 14.28547 | 3.129747 | -0.43645 |
| H | 15.29172 | 3.30378  | -0.81562 |
| H | 13.81147 | 4.082454 | -0.18993 |
| H | 14.33606 | 2.491648 | 0.450861 |
| N | 10.1901  | -0.74937 | -0.37168 |
| C | 8.933544 | -0.98717 | -0.13824 |
| C | 7.942421 | 0.057725 | -0.17837 |
| N | 8.254787 | 1.289155 | -0.45349 |
| C | 9.569082 | 1.567212 | -0.70402 |
| C | 10.54682 | 0.537649 | -0.66195 |
| C | 3.84576  | -5.72829 | 1.504073 |
| C | 5.189024 | -5.45685 | 1.236089 |
| C | 3.231822 | -3.37947 | 1.201121 |
| C | 2.876983 | -4.70059 | 1.486656 |
| C | 2.248097 | -2.35706 | 1.194459 |
| C | 1.404037 | -1.48185 | 1.196664 |
| C | 6.149555 | -6.50439 | 1.255761 |
| C | 6.953286 | -7.4003  | 1.263944 |
| H | 7.667273 | -8.18636 | 1.27939  |
| O | 1.565508 | -5.01544 | 1.708636 |
| O | 3.465443 | -6.99947 | 1.832334 |
| C | 1.216172 | -5.23614 | 3.086149 |
| H | 0.154684 | -5.48004 | 3.091356 |
| H | 1.790618 | -6.06588 | 3.503918 |
| H | 1.38328  | -4.32662 | 3.670658 |
| C | 2.821252 | -7.73461 | 0.778313 |
| H | 2.583609 | -8.71183 | 1.196473 |
| H | 1.904509 | -7.23334 | 0.459281 |
| H | 3.500631 | -7.85761 | -0.07032 |
| N | 6.888188 | -3.83986 | 0.691548 |
| C | 7.202058 | -2.60787 | 0.421263 |
| C | 6.21116  | -1.56044 | 0.387906 |
| N | 4.955934 | -1.79657 | 0.629585 |

|    |          |          |          |
|----|----------|----------|----------|
| C  | 4.598171 | -3.08365 | 0.917559 |
| C  | 5.574294 | -4.11546 | 0.94808  |
| N  | 6.627951 | -0.27837 | 0.087639 |
| N  | 8.515701 | -2.2716  | 0.15734  |
| H  | 9.21055  | -3.00708 | 0.182201 |
| H  | 5.932732 | 0.456741 | 0.06283  |
| C  | 8.983378 | 3.940277 | -1.08371 |
| C  | 12.90948 | -0.17034 | -0.85909 |
| C  | 13.7631  | -1.02696 | -0.81114 |
| C  | 8.160886 | 4.825925 | -1.14604 |
| C  | 7.189116 | 5.860544 | -1.2116  |
| C  | 5.817841 | 5.560281 | -1.11048 |
| C  | 7.578945 | 7.202365 | -1.37907 |
| C  | 4.869502 | 6.57328  | -1.17635 |
| H  | 5.514902 | 4.52833  | -0.98194 |
| C  | 6.6234   | 8.208832 | -1.44343 |
| H  | 8.633637 | 7.437909 | -1.4536  |
| C  | 5.267157 | 7.899707 | -1.34301 |
| H  | 3.816309 | 6.327827 | -1.09823 |
| H  | 6.937125 | 9.238712 | -1.57183 |
| H  | 4.524526 | 8.687756 | -1.3942  |
| C  | 14.75924 | -2.0389  | -0.75968 |
| C  | 14.43458 | -3.34089 | -0.33535 |
| C  | 16.08716 | -1.75832 | -1.13182 |
| C  | 15.41089 | -4.32786 | -0.28536 |
| H  | 13.41318 | -3.55972 | -0.04888 |
| C  | 17.05673 | -2.75192 | -1.07869 |
| H  | 16.34005 | -0.75842 | -1.46294 |
| C  | 16.72402 | -4.03856 | -0.65573 |
| H  | 15.14744 | -5.32683 | 0.043592 |
| H  | 18.0759  | -2.5228  | -1.36909 |
| H  | 17.48324 | -4.81127 | -0.61568 |
| Hg | -1.1E-05 | 0.000095 | 1.194527 |
| C  | -1.40407 | 1.482031 | 1.196673 |
| C  | -2.24815 | 2.357219 | 1.194459 |
| C  | -3.23191 | 3.379602 | 1.201097 |
| C  | -2.87711 | 4.70073  | 1.486645 |
| C  | -4.59824 | 3.083748 | 0.917506 |
| C  | -3.84591 | 5.728403 | 1.504046 |
| O  | -1.56565 | 5.015613 | 1.708665 |
| N  | -4.95597 | 1.796659 | 0.629526 |

|   |          |          |          |
|---|----------|----------|----------|
| C | -5.57439 | 4.115526 | 0.948007 |
| C | -5.18916 | 5.45693  | 1.236029 |
| O | -3.46564 | 6.999586 | 1.832332 |
| C | -1.21635 | 5.236251 | 3.086199 |
| C | -6.21118 | 1.560499 | 0.387815 |
| N | -6.88827 | 3.839897 | 0.691446 |
| C | -6.14972 | 6.50444  | 1.255683 |
| C | -2.8214  | 7.734749 | 0.778358 |
| H | -0.15487 | 5.480178 | 3.091447 |
| H | -1.79083 | 6.065948 | 3.504    |
| H | -1.38345 | 4.326693 | 3.670653 |
| C | -7.20211 | 2.607905 | 0.42115  |
| N | -6.62793 | 0.278418 | 0.087533 |
| C | -6.95348 | 7.400334 | 1.263849 |
| H | -2.58381 | 8.711974 | 1.196541 |
| H | -1.90462 | 7.233505 | 0.459384 |
| H | -3.50072 | 7.857739 | -0.07032 |
| N | -8.51573 | 2.271596 | 0.157194 |
| C | -7.9424  | -0.05772 | -0.17845 |
| H | -5.9327  | -0.45668 | 0.062769 |
| C | -8.93355 | 0.987144 | -0.13834 |
| H | -9.21061 | 3.007052 | 0.182064 |
| N | -8.25473 | -1.28917 | -0.45352 |
| N | -10.1901 | 0.749308 | -0.37175 |
| C | -9.56902 | -1.56727 | -0.70404 |
| C | -10.5468 | -0.53773 | -0.66199 |
| C | -9.94657 | -2.90681 | -1.02243 |
| C | -11.9202 | -0.83914 | -0.9093  |
| C | -11.2968 | -3.17911 | -1.26873 |
| C | -8.98326 | -3.94033 | -1.08367 |
| C | -12.2702 | -2.1603  | -1.20984 |
| C | -12.9095 | 0.17019  | -0.85913 |
| O | -11.6859 | -4.46398 | -1.5307  |
| C | -8.16074 | -4.82596 | -1.14599 |
| O | -13.574  | -2.46225 | -1.4925  |
| C | -13.7631 | 1.026786 | -0.81118 |
| C | -11.9844 | -4.73934 | -2.90999 |
| C | -7.18895 | -5.86056 | -1.21154 |
| C | -14.2854 | -3.12991 | -0.43638 |
| C | -14.7593 | 2.038716 | -0.75972 |
| H | -12.2794 | -5.78718 | -2.94975 |



|   |          |          |          |
|---|----------|----------|----------|
| H | -12.8032 | -4.10911 | -3.26411 |
| H | -11.0953 | -4.58773 | -3.5293  |
| C | -5.81769 | -5.56028 | -1.11029 |
| C | -7.57875 | -7.20237 | -1.37913 |
| H | -15.2916 | -3.30399 | -0.81555 |
| H | -13.8113 | -4.08259 | -0.18982 |
| H | -14.336  | -2.49177 | 0.450893 |
| C | -14.4346 | 3.340701 | -0.33535 |
| C | -16.0872 | 1.758132 | -1.1319  |
| C | -4.86933 | -6.57327 | -1.17616 |
| H | -5.51478 | -4.52834 | -0.98166 |
| C | -6.62319 | -8.20882 | -1.44349 |
| H | -8.63343 | -7.43793 | -1.45376 |
| C | -15.4109 | 4.327655 | -0.28534 |
| H | -13.4132 | 3.559532 | -0.04884 |
| C | -17.0567 | 2.75172  | -1.07876 |
| H | -16.34   | 0.758238 | -1.46306 |
| C | -5.26696 | -7.89969 | -1.34294 |
| H | -3.81615 | -6.3278  | -1.09795 |
| H | -6.93689 | -9.2387  | -1.572   |
| C | -16.7241 | 4.038348 | -0.65576 |
| H | -15.1475 | 5.326615 | 0.043641 |
| H | -18.0759 | 2.522598 | -1.36919 |
| H | -4.52431 | -8.68772 | -1.39413 |
| H | -17.4833 | 4.811056 | -0.6157  |
| H | -7.66748 | 8.186378 | 1.279281 |

## 5.0 N6P-Bu coordinates

Electronic Energy (EE:): -2021.972388 Hartree  
 EE + Thermal Free Energy Correction: -2021.431103 Hartree  
 E (Thermal): 422.764 kcal/mol  
 Entropy (S): 280.717 cal/mol-kelvin  
 Imaginary Freq: 0

|   |          |          |          |
|---|----------|----------|----------|
| 0 | 1        |          |          |
| C | 4.980516 | 0.706434 | -0.0045  |
| C | 3.787342 | 1.43181  | -0.0075  |
| C | 3.787373 | -1.43174 | 0.00737  |
| C | 4.980529 | -0.70634 | 0.00448  |
| O | 6.175563 | -1.37288 | -0.03392 |
| O | 6.175536 | 1.372997 | 0.034029 |

|   |          |          |          |
|---|----------|----------|----------|
| C | 6.880797 | -1.42475 | 1.21648  |
| H | 7.797551 | -1.98029 | 1.022099 |
| H | 7.123361 | -0.41941 | 1.568562 |
| H | 6.287032 | -1.9547  | 1.967447 |
| C | 6.880885 | 1.424897 | -1.21631 |
| H | 7.797617 | 1.980438 | -1.02183 |
| H | 7.123493 | 0.419558 | -1.56839 |
| H | 6.287187 | 1.954849 | -1.96732 |
| N | 1.378947 | 1.405969 | 0.004956 |
| C | 0.275276 | 0.720075 | 0.002554 |
| C | 0.27529  | -0.72009 | -0.0029  |
| N | 1.378977 | -1.40596 | -0.00528 |
| C | 2.556499 | -0.71091 | -0.003   |
| C | 2.556484 | 0.710946 | 0.002741 |
| C | -6.87125 | 0.706208 | 0.010347 |
| C | -5.67464 | 1.425743 | 0.021571 |
| C | -5.67463 | -1.42585 | -0.02159 |
| C | -6.87125 | -0.70633 | -0.01025 |
| C | -5.69349 | -2.84716 | -0.04613 |
| C | -5.72027 | -4.05002 | -0.07836 |
| H | -5.73912 | -5.1117  | -0.097   |
| C | -5.6935  | 2.847051 | 0.04612  |
| C | -5.72016 | 4.049912 | 0.078392 |
| H | -5.7389  | 5.111587 | 0.097125 |
| O | -8.0625  | -1.37551 | 0.025635 |
| O | -8.06251 | 1.375375 | -0.02542 |
| C | -8.77243 | -1.4249  | -1.22356 |
| H | -9.68854 | -1.97979 | -1.0257  |
| H | -9.01473 | -0.41866 | -1.57287 |
| H | -8.18154 | -1.95513 | -1.97631 |
| C | -8.77231 | 1.424773 | 1.223854 |
| H | -9.68844 | 1.979665 | 1.026099 |
| H | -9.01456 | 0.418532 | 1.573194 |
| H | -8.18133 | 1.955001 | 1.97654  |
| N | -3.2664  | 1.407017 | 0.008746 |
| C | -2.16183 | 0.721485 | 0.004194 |
| C | -2.16182 | -0.72155 | -0.00449 |
| N | -3.26638 | -1.4071  | -0.00897 |
| C | -4.44241 | -0.71034 | -0.00425 |
| C | -4.44242 | 0.710237 | 0.004126 |
| N | -0.94464 | -1.37314 | -0.00682 |

|   |          |          |          |
|---|----------|----------|----------|
| N | -0.94466 | 1.373101 | 0.006475 |
| H | -0.94484 | 2.385182 | 0.011071 |
| H | -0.9448  | -2.38522 | -0.01142 |
| C | 3.80523  | -2.85192 | 0.013817 |
| C | 3.805143 | 2.851989 | -0.01388 |
| C | 3.823971 | 4.059072 | -0.02286 |
| C | 3.824148 | -4.059   | 0.0229   |
| C | 3.835717 | -5.5279  | 0.01811  |
| C | 3.83538  | 5.52797  | -0.01797 |
| C | 2.78537  | -6.05046 | 1.025547 |
| H | 1.786291 | -5.69595 | 0.762713 |
| H | 2.776748 | -7.14464 | 1.02543  |
| H | 3.011888 | -5.70726 | 2.037597 |
| C | 5.24073  | -6.03292 | 0.41855  |
| H | 5.998614 | -5.6628  | -0.27547 |
| H | 5.50438  | -5.69394 | 1.423132 |
| H | 5.264285 | -7.12676 | 0.406841 |
| C | 3.493005 | 6.032866 | 1.403943 |
| H | 3.492997 | 7.127005 | 1.42266  |
| H | 2.506409 | 5.681416 | 1.713888 |
| H | 4.225558 | 5.674686 | 2.13064  |
| C | 2.781023 | 6.050483 | -1.02122 |
| H | 2.77221  | 7.144662 | -1.02093 |
| H | 3.003642 | 5.707446 | -2.03419 |
| H | 1.783041 | 5.695765 | -0.75453 |
| C | 3.487835 | -6.03298 | -1.4024  |
| H | 2.500022 | -5.68162 | -1.70853 |
| H | 4.217533 | -5.67485 | -2.13199 |
| H | 3.487821 | -7.12712 | -1.42098 |
| C | 5.238751 | 6.033224 | -0.42385 |
| H | 5.999366 | 5.663291 | 0.267276 |
| H | 5.498594 | 5.694242 | -1.42942 |
| H | 5.262141 | 7.127073 | -0.41229 |

## 6.0 N6P-Bu dimer coordinates

N6P-Bu Hg dimer: 30 degrees

Electronic Energy (EE:) -4195.822090 Hartree

EE + Thermal Free Energy Correction: -4194.744270 Hartree

E (Thermal): 836.200 kcal/mol

Entropy (S): 538.151 cal/mol-kelvin

Imaginary Freq: 0

|   |          |          |          |
|---|----------|----------|----------|
| 0 | 1        |          |          |
| C | -6.55657 | -5.14191 | -2.35366 |
| C | -5.71227 | -4.05014 | -2.14206 |
| C | -8.42306 | -4.0353  | -1.21902 |
| C | -7.89392 | -5.13477 | -1.89788 |
| O | -8.69516 | -6.21137 | -2.16732 |
| O | -6.0718  | -6.2602  | -2.9768  |
| C | -8.47833 | -7.35428 | -1.32468 |
| H | -9.18228 | -8.11445 | -1.66162 |
| H | -7.45553 | -7.72453 | -1.4264  |
| H | -8.68674 | -7.10316 | -0.2802  |
| C | -6.46924 | -6.40896 | -4.3491  |
| H | -6.01054 | -7.33398 | -4.69677 |
| H | -7.55622 | -6.47907 | -4.43406 |
| H | -6.09706 | -5.57145 | -4.94694 |
| N | -5.41557 | -1.84285 | -1.22534 |
| C | -5.9209  | -0.82315 | -0.59813 |
| C | -7.28773 | -0.81062 | -0.14457 |
| N | -8.08424 | -1.81868 | -0.33976 |
| C | -7.58005 | -2.90602 | -0.99796 |
| C | -6.23054 | -2.91852 | -1.44514 |
| C | -4.99072 | 5.742367 | 2.07024  |
| C | -4.46052 | 4.634022 | 1.404111 |
| C | -7.17721 | 4.667954 | 2.277774 |
| C | -6.33491 | 5.758857 | 2.502741 |
| C | -8.52854 | 4.703508 | 2.717272 |
| C | -9.67425 | 4.74778  | 3.083565 |
| H | -10.6833 | 4.778683 | 3.413351 |
| C | -3.10692 | 4.633745 | 0.978599 |
| C | -1.94529 | 4.639246 | 0.619339 |
| O | -6.80287 | 6.84352  | 3.190666 |
| O | -4.21235 | 6.848696 | 2.267765 |
| C | -7.12722 | 7.985947 | 2.380666 |
| H | -7.47727 | 8.752701 | 3.070518 |
| H | -6.2463  | 8.343516 | 1.842646 |
| H | -7.92673 | 7.738371 | 1.676082 |
| C | -3.71101 | 7.00989  | 3.605666 |
| H | -3.12587 | 7.928516 | 3.598391 |
| H | -4.53271 | 7.097868 | 4.319968 |

|   |          |          |          |
|---|----------|----------|----------|
| H | -3.06438 | 6.168893 | 3.873056 |
| N | -4.80096 | 2.424358 | 0.505437 |
| C | -5.59713 | 1.415432 | 0.309255 |
| C | -6.9673  | 1.428949 | 0.761581 |
| N | -7.47237 | 2.450467 | 1.38699  |
| C | -6.65578 | 3.524522 | 1.606022 |
| C | -5.30693 | 3.512092 | 1.160389 |
| N | -7.74655 | 0.316123 | 0.514446 |
| N | -5.13937 | 0.291093 | -0.34846 |
| H | -4.17908 | 0.281293 | -0.66801 |
| H | -8.70745 | 0.325793 | 0.832244 |
| C | -9.76956 | -4.04276 | -0.76727 |
| C | -4.36984 | -4.07201 | -2.60527 |
| C | -3.2297  | -4.08708 | -3.00199 |
| C | -10.9126 | -4.04991 | -0.37892 |
| C | -12.3061 | -4.04107 | 0.085834 |
| C | -1.83634 | -4.09933 | -3.46696 |
| C | -12.596  | -2.69993 | 0.798082 |
| H | -12.4411 | -1.85889 | 0.118613 |
| H | -13.6324 | -2.67653 | 1.148337 |
| H | -11.9366 | -2.567   | 1.658737 |
| C | -12.527  | -5.2123  | 1.071496 |
| H | -12.3268 | -6.17095 | 0.587498 |
| H | -11.8672 | -5.12237 | 1.937465 |
| H | -13.5624 | -5.21407 | 1.425286 |
| C | -1.10161 | -5.30995 | -2.8449  |
| H | -0.06242 | -5.33385 | -3.18664 |
| H | -1.105   | -5.24833 | -1.75439 |
| H | -1.5832  | -6.24687 | -3.13348 |
| C | -1.1434  | -2.78778 | -3.03107 |
| H | -0.10248 | -2.7825  | -3.36804 |
| H | -1.65049 | -1.92017 | -3.45928 |
| H | -1.15571 | -2.68595 | -1.94362 |
| C | -13.2498 | -4.20171 | -1.12908 |
| H | -13.1138 | -3.38197 | -1.83799 |
| H | -13.0528 | -5.13979 | -1.6527  |
| H | -14.2923 | -4.20207 | -0.79627 |
| C | -1.80975 | -4.21397 | -5.00917 |
| H | -2.29499 | -5.1354  | -5.33915 |
| H | -2.32765 | -3.37056 | -5.47154 |
| H | -0.77553 | -4.22179 | -5.36627 |

|    |          |          |          |
|----|----------|----------|----------|
| Hg | -2.2E-05 | 4.641377 | 0.000049 |
| C  | 1.945239 | 4.639273 | -0.61926 |
| C  | 3.106863 | 4.633778 | -0.97854 |
| C  | 4.460454 | 4.634063 | -1.40409 |
| C  | 4.990625 | 5.742409 | -2.07024 |
| C  | 5.306867 | 3.512131 | -1.16041 |
| C  | 6.334802 | 5.758896 | -2.50279 |
| O  | 4.212249 | 6.84874  | -2.26773 |
| N  | 4.800926 | 2.424398 | -0.50543 |
| C  | 6.655704 | 3.524555 | -1.6061  |
| C  | 7.177099 | 4.667986 | -2.27787 |
| O  | 6.802735 | 6.843559 | -3.19073 |
| C  | 3.710858 | 7.009942 | -3.60561 |
| C  | 5.597096 | 1.415466 | -0.30929 |
| N  | 7.472298 | 2.450497 | -1.38711 |
| C  | 8.528411 | 4.703534 | -2.71744 |
| C  | 7.127116 | 7.985986 | -2.38075 |
| H  | 3.125714 | 7.928562 | -3.5983  |
| H  | 4.532532 | 7.097934 | -4.31994 |
| H  | 3.064227 | 6.168941 | -3.87298 |
| C  | 6.967247 | 1.428979 | -0.76168 |
| N  | 5.139354 | 0.291122 | 0.348425 |
| C  | 9.674101 | 4.747801 | -3.08379 |
| H  | 7.477156 | 8.752736 | -3.07061 |
| H  | 6.246209 | 8.343562 | -1.8427  |
| H  | 7.926639 | 7.738406 | -1.67618 |
| N  | 7.746505 | 0.316147 | -0.51458 |
| C  | 5.920906 | -0.82311 | 0.598099 |
| H  | 4.179073 | 0.28132  | 0.668009 |
| C  | 7.287712 | -0.81059 | 0.144489 |
| H  | 8.707389 | 0.325821 | -0.83241 |
| N  | 5.41561  | -1.84279 | 1.225353 |
| N  | 8.08424  | -1.81863 | 0.339671 |
| C  | 6.230588 | -2.91846 | 1.44514  |
| C  | 7.580077 | -2.90596 | 0.997899 |
| C  | 5.71235  | -4.05008 | 2.142087 |
| C  | 8.423092 | -4.03524 | 1.218925 |
| C  | 6.556651 | -5.14185 | 2.353648 |
| C  | 4.369946 | -4.07193 | 2.605389 |
| C  | 7.893975 | -5.13472 | 1.897805 |
| C  | 9.769576 | -4.04271 | 0.767116 |

|   |          |          |          |
|---|----------|----------|----------|
| O | 6.071902 | -6.26013 | 2.976811 |
| C | 3.229847 | -4.08701 | 3.002216 |
| O | 8.69522  | -6.21132 | 2.167205 |
| C | 10.91262 | -4.04986 | 0.37872  |
| C | 6.469408 | -6.40889 | 4.349091 |
| C | 1.836547 | -4.09926 | 3.467364 |
| C | 8.478328 | -7.35424 | 1.324587 |
| C | 12.30604 | -4.04097 | -0.08609 |
| H | 6.010694 | -7.33389 | 4.696798 |
| H | 7.556384 | -6.47902 | 4.433997 |
| H | 6.097278 | -5.57136 | 4.946937 |
| C | 1.141814 | -2.7904  | 3.026283 |
| C | 1.810275 | -4.20771 | 5.010031 |
| C | 1.103377 | -5.31335 | 2.850273 |
| H | 9.182303 | -8.11441 | 1.661498 |
| H | 7.455539 | -7.72448 | 1.426382 |
| H | 8.68668  | -7.10314 | 0.280091 |
| C | 13.24988 | -4.20123 | 1.128823 |
| C | 12.59581 | -2.69994 | -0.79864 |
| C | 12.52707 | -5.21238 | -1.0715  |
| H | 1.15382  | -2.69294 | 1.938421 |
| H | 0.100932 | -2.78512 | 3.363383 |
| H | 1.647829 | -1.9204  | 3.450908 |
| H | 2.296754 | -5.12717 | 5.343677 |
| H | 2.327129 | -3.36177 | 5.46894  |
| H | 0.7761   | -4.21544 | 5.367281 |
| H | 1.106552 | -5.25612 | 1.759522 |
| H | 1.586263 | -6.24846 | 3.142552 |
| H | 0.064258 | -5.33729 | 3.192235 |
| H | 14.29232 | -4.20153 | 0.795984 |
| H | 13.11379 | -3.38136 | 1.837566 |
| H | 13.05298 | -5.13922 | 1.652647 |
| H | 13.63214 | -2.67651 | -1.14894 |
| H | 11.93636 | -2.56728 | -1.65929 |
| H | 12.44083 | -1.85877 | -0.11934 |
| H | 12.32696 | -6.17095 | -0.58729 |
| H | 11.86721 | -5.12271 | -1.93747 |
| H | 13.5625  | -5.21412 | -1.42532 |
| H | 10.68311 | 4.778708 | -3.41362 |

N6P-Bu Hg dimer: 90 degrees

Electronic Energy (EE:) -4195.821840 Hartree

EE + Thermal Free Energy Correction: -4194.745077 Hartree

E (Thermal): 836.190 kcal/mol

Entropy (S): 540.344 cal/mol-kelvin

Imaginary Freq: 0

|   |          |          |          |
|---|----------|----------|----------|
| 0 | 1        |          |          |
| C | 8.281598 | -4.24666 | -3.0761  |
| C | 7.24892  | -3.35117 | -2.79082 |
| C | 9.699375 | -3.31712 | -1.30925 |
| C | 9.490924 | -4.22921 | -2.34586 |
| O | 10.45715 | -5.15468 | -2.63512 |
| O | 8.141009 | -5.13259 | -4.11019 |
| C | 11.23295 | -4.87337 | -3.81094 |
| H | 11.94759 | -5.69053 | -3.90261 |
| H | 10.59604 | -4.83586 | -4.69776 |
| H | 11.77355 | -3.9292  | -3.69414 |
| C | 7.846108 | -6.48188 | -3.71544 |
| H | 7.766002 | -7.05496 | -4.63849 |
| H | 8.646835 | -6.88931 | -3.09379 |
| H | 6.893454 | -6.52254 | -3.17866 |
| N | 6.443455 | -1.51953 | -1.45039 |
| C | 6.646888 | -0.67885 | -0.48071 |
| C | 7.875011 | -0.66831 | 0.271243 |
| N | 8.841101 | -1.49981 | 0.018469 |
| C | 8.655041 | -2.39717 | -0.99642 |
| C | 7.44315  | -2.40621 | -1.74003 |
| C | 4.190158 | 4.73855  | 3.48259  |
| C | 3.990047 | 3.831325 | 2.438508 |
| C | 6.41445  | 3.834268 | 3.94411  |
| C | 5.389944 | 4.739992 | 4.227272 |
| C | 7.614158 | 3.848369 | 4.706384 |
| C | 8.621647 | 3.861268 | 5.364857 |
| H | 9.516285 | 3.87535  | 5.936936 |
| C | 2.779255 | 3.844715 | 1.698773 |
| C | 1.741198 | 3.861424 | 1.065812 |
| O | 5.564728 | 5.672699 | 5.211403 |
| O | 3.192656 | 5.609678 | 3.82187  |
| C | 4.889859 | 5.387446 | 6.448101 |
| H | 5.125288 | 6.215076 | 7.115904 |



|   |          |          |          |
|---|----------|----------|----------|
| H | 3.809654 | 5.327438 | 6.296422 |
| H | 5.264154 | 4.454358 | 6.879596 |
| C | 3.390636 | 6.96394  | 3.381607 |
| H | 2.525197 | 7.523682 | 3.733838 |
| H | 4.303852 | 7.382096 | 3.810905 |
| H | 3.431274 | 7.006305 | 2.289115 |
| N | 4.83663  | 1.999377 | 1.121963 |
| C | 5.802779 | 1.167384 | 0.867716 |
| C | 7.032838 | 1.177148 | 1.622125 |
| N | 7.234892 | 2.018212 | 2.592461 |
| C | 6.234478 | 2.904344 | 2.879496 |
| C | 5.022956 | 2.894697 | 2.137728 |
| N | 8.009802 | 0.260399 | 1.288085 |
| N | 5.668241 | 0.240646 | -0.14667 |
| H | 4.805746 | 0.232632 | -0.67618 |
| H | 8.872765 | 0.268347 | 1.816807 |
| C | 10.92015 | -3.31459 | -0.58332 |
| C | 6.039895 | -3.38048 | -3.53554 |
| C | 5.011432 | -3.40939 | -4.16717 |
| C | 11.96008 | -3.31226 | 0.029894 |
| C | 13.21539 | -3.31024 | 0.792784 |
| C | 3.761929 | -3.42579 | -4.93942 |
| C | 13.61896 | -1.85121 | 1.107862 |
| H | 12.84092 | -1.35095 | 1.688627 |
| H | 14.54819 | -1.83475 | 1.68542  |
| H | 13.7741  | -1.28278 | 0.188003 |
| C | 14.32526 | -3.99153 | -0.04011 |
| H | 14.0522  | -5.02106 | -0.28217 |
| H | 14.49422 | -3.45462 | -0.97648 |
| H | 15.26313 | -4.00493 | 0.523286 |
| C | 3.795535 | -2.28378 | -5.98279 |
| H | 2.868256 | -2.28052 | -6.56378 |
| H | 3.900278 | -1.31308 | -5.49318 |
| H | 4.634357 | -2.41029 | -6.67083 |
| C | 2.5663   | -3.21748 | -3.98114 |
| H | 1.628549 | -3.21795 | -4.54489 |
| H | 2.521268 | -4.01461 | -3.23556 |
| H | 2.653234 | -2.2646  | -3.45446 |
| C | 13.00725 | -4.08781 | 2.114179 |
| H | 12.22255 | -3.62586 | 2.717355 |
| H | 12.71902 | -5.12238 | 1.915215 |

|    |          |          |          |
|----|----------|----------|----------|
| H  | 13.93422 | -4.09212 | 2.695729 |
| C  | 3.621674 | -4.78485 | -5.66257 |
| H  | 4.464669 | -4.955   | -6.336   |
| H  | 3.588719 | -5.60673 | -4.9435  |
| H  | 2.698951 | -4.80421 | -6.25024 |
| Hg | 0.000003 | 3.865481 | -3.2E-05 |
| C  | -1.74119 | 3.861408 | -1.06588 |
| C  | -2.77924 | 3.84469  | -1.69885 |
| C  | -3.99002 | 3.831272 | -2.4386  |
| C  | -4.1901  | 4.738433 | -3.48275 |
| C  | -5.02295 | 2.894672 | -2.13779 |
| C  | -5.38988 | 4.739841 | -4.22745 |
| O  | -3.19258 | 5.609527 | -3.82207 |
| N  | -4.83665 | 1.999413 | -1.12196 |
| C  | -6.23445 | 2.904281 | -2.87958 |
| C  | -6.41439 | 3.834141 | -3.94426 |
| O  | -5.56463 | 5.672492 | -5.21164 |
| C  | -3.39055 | 6.963819 | -3.38189 |
| C  | -5.80281 | 1.167439 | -0.86769 |
| N  | -7.23487 | 2.018168 | -2.59252 |
| C  | -7.61409 | 3.848207 | -4.70656 |
| C  | -4.88978 | 5.387125 | -6.44833 |
| H  | -2.52509 | 7.523522 | -3.73412 |
| H  | -4.30374 | 7.381969 | -3.81124 |
| H  | -3.43122 | 7.006249 | -2.2894  |
| C  | -7.03284 | 1.177159 | -1.62213 |
| N  | -5.6683  | 0.240763 | 0.146756 |
| C  | -8.62156 | 3.861077 | -5.36505 |
| H  | -5.12516 | 6.21473  | -7.11618 |
| H  | -3.80958 | 5.327061 | -6.29665 |
| H  | -5.26413 | 4.454034 | -6.87977 |
| N  | -8.00982 | 0.260429 | -1.28807 |
| C  | -6.64693 | -0.67875 | 0.480791 |
| H  | -4.80581 | 0.232774 | 0.676278 |
| C  | -7.87503 | -0.66825 | -0.2712  |
| H  | -8.87276 | 0.268336 | -1.81682 |
| N  | -6.44351 | -1.51939 | 1.4505   |
| N  | -8.84111 | -1.49978 | -0.01844 |
| C  | -7.44319 | -2.4061  | 1.740125 |
| C  | -8.65505 | -2.39712 | 0.996467 |
| C  | -7.24896 | -3.35104 | 2.790938 |

|   |          |          |          |
|---|----------|----------|----------|
| C | -9.69936 | -3.3171  | 1.309277 |
| C | -8.28161 | -4.24657 | 3.076184 |
| C | -6.03997 | -3.38028 | 3.535718 |
| C | -9.49091 | -4.22918 | 2.345895 |
| C | -10.9201 | -3.31461 | 0.583306 |
| O | -8.14102 | -5.13249 | 4.11028  |
| C | -5.01156 | -3.40913 | 4.167428 |
| O | -10.4571 | -5.15469 | 2.635125 |
| C | -11.96   | -3.3123  | -0.02995 |
| C | -7.846   | -6.48176 | 3.715549 |
| C | -3.76214 | -3.42543 | 4.939811 |
| C | -11.233  | -4.87339 | 3.810909 |
| C | -13.2153 | -3.31025 | -0.7929  |
| H | -7.76589 | -7.05483 | 4.638608 |
| H | -8.64666 | -6.88926 | 3.093857 |
| H | -6.89331 | -6.52235 | 3.178819 |
| C | -2.56631 | -3.21848 | 3.981481 |
| C | -3.62257 | -4.78393 | 5.664138 |
| C | -3.79533 | -2.28252 | 5.982194 |
| H | -11.9476 | -5.69058 | 3.902557 |
| H | -10.5961 | -4.83585 | 4.697752 |
| H | -11.7736 | -3.92924 | 3.694065 |
| C | -13.0078 | -4.09001 | -2.11311 |
| C | -13.6175 | -1.85131 | -1.11019 |
| C | -14.3258 | -3.98923 | 0.040982 |
| H | -2.65276 | -2.26601 | 3.453978 |
| H | -1.62862 | -3.2189  | 4.545333 |
| H | -2.52157 | -4.01627 | 3.236579 |
| H | -4.46572 | -4.95314 | 6.337617 |
| H | -3.58991 | -5.60644 | 4.945778 |
| H | -2.69992 | -4.80321 | 6.251922 |
| H | -3.89961 | -1.31219 | 5.491751 |
| H | -4.63427 | -2.40806 | 6.670277 |
| H | -2.8681  | -2.27915 | 6.563267 |
| H | -13.9348 | -4.09435 | -2.69467 |
| H | -12.2227 | -3.6297  | -2.71697 |
| H | -12.7206 | -5.12454 | -1.91257 |
| H | -14.5467 | -1.83483 | -1.68781 |
| H | -13.7721 | -1.28136 | -0.19119 |
| H | -12.8389 | -1.35267 | -1.69167 |
| H | -14.0538 | -5.01867 | 0.284568 |

|   |          |          |          |
|---|----------|----------|----------|
| H | -14.4943 | -3.45077 | 0.976544 |
| H | -15.2637 | -4.00257 | -0.52243 |
| H | -9.51618 | 3.875143 | -5.93716 |

N6P-Bu Hg dimer: 180 degrees

Electronic Energy (EE:) -4195.821945 Hartree

EE + Thermal Free Energy Correction: -4194.744886 Hartree

E (Thermal): 836.190 kcal/mol

Entropy (S): 539.722 cal/mol-kelvin

Imaginary Freq: 0

|   |          |          |          |
|---|----------|----------|----------|
| 0 | 1        |          |          |
| C | -11.4037 | 2.937035 | 1.246348 |
| C | -10.0485 | 2.700239 | 1.006784 |
| C | -11.9676 | 0.576633 | 0.920909 |
| C | -12.3506 | 1.889393 | 1.202963 |
| O | -13.6614 | 2.164874 | 1.485491 |
| O | -11.8337 | 4.214386 | 1.485399 |
| C | -14.3946 | 2.781525 | 0.415287 |
| H | -15.4046 | 2.937327 | 0.792874 |
| H | -13.9493 | 3.740599 | 0.140432 |
| H | -14.4297 | 2.11848  | -0.4545  |
| C | -12.1323 | 4.506082 | 2.859951 |
| H | -12.4558 | 5.54612  | 2.883434 |
| H | -12.9318 | 3.860112 | 3.230117 |
| H | -11.2367 | 4.389986 | 3.477719 |
| N | -8.31357 | 1.118864 | 0.46729  |
| C | -7.96877 | -0.10754 | 0.211188 |
| C | -8.93201 | -1.17771 | 0.180927 |
| N | -10.1947 | -0.97033 | 0.407455 |
| C | -10.5871 | 0.310847 | 0.679903 |
| C | -9.63609 | 1.367347 | 0.709819 |
| C | -2.7754  | -4.75791 | -1.36834 |
| C | -3.16433 | -3.44285 | -1.09873 |
| C | -5.06951 | -5.56754 | -1.12441 |
| C | -3.71828 | -5.80892 | -1.38136 |
| C | -6.00407 | -6.63848 | -1.13894 |
| C | -6.7857  | -7.5538  | -1.14271 |
| H | -7.48061 | -8.35681 | -1.15431 |
| C | -2.20443 | -2.39796 | -1.09479 |
| C | -1.37782 | -1.50621 | -1.09827 |

|   |          |          |          |
|---|----------|----------|----------|
| O | -3.30475 | -7.07399 | -1.69393 |
| O | -1.45491 | -5.043   | -1.57858 |
| C | -2.64996 | -7.78161 | -0.62781 |
| H | -2.38536 | -8.75716 | -1.03362 |
| H | -1.74806 | -7.25453 | -0.30806 |
| H | -3.33192 | -7.91234 | 0.21764  |
| C | -1.09133 | -5.2665  | -2.95152 |
| H | -0.02415 | -5.48449 | -2.94795 |
| H | -1.64256 | -6.11355 | -3.36599 |
| H | -1.27662 | -4.36636 | -3.54509 |
| N | -4.93068 | -1.8961  | -0.55673 |
| C | -6.19303 | -1.6882  | -0.32532 |
| C | -7.15765 | -2.76106 | -0.35181 |
| N | -6.81133 | -3.98777 | -0.60673 |
| C | -5.4894  | -4.23319 | -0.85291 |
| C | -4.53932 | -3.17733 | -0.82768 |
| N | -8.47998 | -2.45532 | -0.09793 |
| N | -6.64366 | -0.41397 | -0.04358 |
| H | -5.96748 | 0.338795 | -0.02226 |
| H | -9.15653 | -3.20784 | -0.11794 |
| C | -12.9312 | -0.46608 | 0.881894 |
| C | -9.10935 | 3.764722 | 1.052238 |
| C | -8.31164 | 4.669878 | 1.095162 |
| C | -13.7504 | -1.35206 | 0.844261 |
| C | -14.7357 | -2.44095 | 0.809824 |
| C | -7.33441 | 5.766112 | 1.129833 |
| C | -14.0039 | -3.7813  | 0.569167 |
| H | -13.2835 | -3.97816 | 1.366184 |
| H | -14.7249 | -4.6039  | 0.542512 |
| H | -13.4637 | -3.76339 | -0.38007 |
| C | -15.744  | -2.18601 | -0.33505 |
| H | -16.2732 | -1.24222 | -0.18455 |
| H | -15.2345 | -2.14176 | -1.30029 |
| H | -16.4819 | -2.99316 | -0.37091 |
| C | -7.02974 | 6.219929 | -0.31766 |
| H | -6.29968 | 7.035051 | -0.30827 |
| H | -6.62011 | 5.395315 | -0.90522 |
| H | -7.93653 | 6.573527 | -0.81339 |
| C | -6.03339 | 5.269698 | 1.802148 |
| H | -5.29191 | 6.074001 | 1.825395 |
| H | -6.22397 | 4.946258 | 2.827987 |

|    |          |          |          |
|----|----------|----------|----------|
| H  | -5.61124 | 4.425195 | 1.253036 |
| C  | -15.4877 | -2.49151 | 2.160459 |
| H  | -14.7948 | -2.67502 | 2.984585 |
| H  | -16.0029 | -1.54802 | 2.353811 |
| H  | -16.2296 | -3.29581 | 2.1465   |
| C  | -7.91839 | 6.951212 | 1.932453 |
| H  | -8.84497 | 7.308856 | 1.477888 |
| H  | -8.13577 | 6.654879 | 2.961294 |
| H  | -7.20214 | 7.778017 | 1.956251 |
| Hg | 0.00001  | 0.000126 | -1.09604 |
| C  | 1.377841 | 1.50646  | -1.09826 |
| C  | 2.204473 | 2.398187 | -1.09479 |
| C  | 3.164423 | 3.443032 | -1.09876 |
| C  | 2.775534 | 4.75812  | -1.36828 |
| C  | 4.539428 | 3.17743  | -0.82783 |
| C  | 3.718466 | 5.80909  | -1.38133 |
| O  | 1.455052 | 5.04329  | -1.5784  |
| N  | 4.930741 | 1.896169 | -0.55698 |
| C  | 5.489543 | 4.233253 | -0.85307 |
| C  | 5.069707 | 5.567635 | -1.12447 |
| O  | 3.304963 | 7.074189 | -1.69382 |
| C  | 1.091358 | 5.266856 | -2.9513  |
| C  | 6.193097 | 1.688202 | -0.32567 |
| N  | 6.811482 | 3.987763 | -0.60697 |
| C  | 6.004306 | 6.638534 | -1.13903 |
| C  | 2.650358 | 7.781822 | -0.6276  |
| H  | 0.024199 | 5.484896 | -2.94764 |
| H  | 1.6426   | 6.113887 | -3.3658  |
| H  | 1.276555 | 4.366718 | -3.54492 |
| C  | 7.157769 | 2.761029 | -0.35215 |
| N  | 6.643698 | 0.41393  | -0.04407 |
| C  | 6.785981 | 7.553824 | -1.14281 |
| H  | 2.385749 | 8.757389 | -1.03335 |
| H  | 1.748475 | 7.254772 | -0.30773 |
| H  | 3.332434 | 7.912503 | 0.217762 |
| N  | 8.480095 | 2.455213 | -0.09839 |
| C  | 7.968775 | 0.107472 | 0.21083  |
| H  | 5.967485 | -0.3388  | -0.02268 |
| C  | 8.932055 | 1.177599 | 0.180596 |
| H  | 9.156662 | 3.207721 | -0.1183  |
| N  | 8.313516 | -1.11894 | 0.467018 |

|   |          |          |          |
|---|----------|----------|----------|
| N | 10.19468 | 0.970197 | 0.40725  |
| C | 9.636014 | -1.36746 | 0.709655 |
| C | 10.58703 | -0.31099 | 0.67978  |
| C | 10.04837 | -2.70035 | 1.006702 |
| C | 11.96757 | -0.5768  | 0.920925 |
| C | 11.40348 | -2.93718 | 1.246392 |
| C | 9.109159 | -3.7648  | 1.052114 |
| C | 12.35045 | -1.88957 | 1.203068 |
| C | 12.93115 | 0.465889 | 0.881991 |
| O | 11.83345 | -4.21453 | 1.485515 |
| C | 8.311419 | -4.66993 | 1.095002 |
| O | 13.66124 | -2.16508 | 1.485751 |
| C | 13.75038 | 1.351831 | 0.844444 |
| C | 12.13188 | -4.50622 | 2.860117 |
| C | 7.334174 | -5.76615 | 1.129589 |
| C | 14.39451 | -2.78169 | 0.415604 |
| C | 14.73576 | 2.440683 | 0.810171 |
| H | 12.45535 | -5.54625 | 2.883658 |
| H | 12.93128 | -3.86024 | 3.230417 |
| H | 11.2361  | -4.39014 | 3.477734 |
| C | 6.03302  | -5.26965 | 1.80158  |
| C | 7.917963 | -6.95117 | 1.932463 |
| C | 7.02981  | -6.22011 | -0.31792 |
| H | 15.40448 | -2.93749 | 0.793289 |
| H | 13.94927 | -3.74076 | 0.14068  |
| H | 14.42976 | -2.11862 | -0.45416 |
| C | 15.48875 | 2.49012  | 2.160304 |
| C | 14.00387 | 3.781266 | 0.571104 |
| C | 15.74324 | 2.186579 | -0.33563 |
| H | 5.610986 | -4.4252  | 1.25229  |
| H | 5.291518 | -6.07394 | 1.82476  |
| H | 6.223394 | -4.9461  | 2.827423 |
| H | 8.844645 | -7.30887 | 1.478133 |
| H | 8.135123 | -6.65474 | 2.961321 |
| H | 7.201705 | -7.77797 | 1.956188 |
| H | 6.620309 | -5.39556 | -0.90565 |
| H | 7.936694 | -6.57377 | -0.81341 |
| H | 6.299736 | -7.03523 | -0.3086  |
| H | 16.23067 | 3.294356 | 2.146439 |
| H | 14.79641 | 2.673052 | 2.98507  |
| H | 16.004   | 1.546424 | 2.352546 |

|   |          |          |          |
|---|----------|----------|----------|
| H | 14.72493 | 4.603831 | 0.544561 |
| H | 13.46298 | 3.764141 | -0.37775 |
| H | 13.28402 | 3.977565 | 1.3688   |
| H | 16.27241 | 1.242635 | -0.18626 |
| H | 15.23296 | 2.14313  | -1.30054 |
| H | 16.48117 | 2.993713 | -0.37138 |
| H | 7.480934 | 8.356791 | -1.15449 |

## 7.0 N4A coordinates

Electronic Energy (EE:) -1214.358769 Hartree

EE + Thermal Free Energy Correction: -1214.122436 Hartree

E (Thermal): 198.545 kcal/mol

Entropy (S): 170.507 cal/mol-kelvin

Imaginary Freq: 0

|   |          |          |          |
|---|----------|----------|----------|
| 0 | 1        |          |          |
| C | 3.782109 | -0.94887 | -0.07594 |
| C | 3.82127  | 0.517389 | -0.15509 |
| C | -3.20245 | -0.67981 | 0.040111 |
| C | -2.04481 | -1.43957 | 0.032421 |
| C | -1.94966 | 1.429839 | -0.02916 |
| C | -3.15499 | 0.748142 | 0.011872 |
| C | -1.92338 | 2.849801 | -0.05503 |
| C | -1.91109 | 4.053057 | -0.06546 |
| H | -1.8887  | 5.11467  | -0.08491 |
| C | -2.11015 | -2.85793 | 0.059172 |
| C | -2.1732  | -4.0595  | 0.070936 |
| H | -2.2132  | -5.12068 | 0.08984  |
| O | -4.32844 | 1.441317 | -0.02223 |
| O | -4.41891 | -1.29151 | 0.120398 |
| C | -5.02377 | 1.541779 | 1.234016 |
| H | -5.93048 | 2.108307 | 1.027751 |
| H | -5.28112 | 0.551772 | 1.616215 |
| H | -4.41279 | 2.083795 | 1.961437 |
| C | -5.15326 | -1.36445 | -1.11524 |
| H | -6.08955 | -1.86642 | -0.87638 |
| H | -5.35537 | -0.36497 | -1.50656 |
| H | -4.59956 | -1.9559  | -1.84988 |
| N | 0.349257 | -1.49546 | -0.00309 |
| C | 1.502184 | -0.84141 | -0.04781 |
| C | 1.548303 | 0.594882 | -0.09715 |



|   |          |          |          |
|---|----------|----------|----------|
| N | 0.442756 | 1.326965 | -0.09578 |
| C | -0.72534 | 0.672287 | -0.04842 |
| C | -0.77265 | -0.76441 | -0.00183 |
| N | 2.753814 | 1.245848 | -0.15757 |
| N | 2.659018 | -1.5818  | -0.03251 |
| O | 5.037043 | 1.069284 | -0.25041 |
| O | 4.917506 | -1.67314 | -0.14087 |
| C | 5.089805 | 2.503653 | -0.37891 |
| H | 4.552909 | 2.823548 | -1.27259 |
| H | 4.641722 | 2.98182  | 0.493021 |
| H | 6.148127 | 2.742265 | -0.45466 |
| C | 5.888299 | -1.52277 | 0.910657 |
| H | 5.446392 | -1.80732 | 1.869897 |
| H | 6.690769 | -2.21482 | 0.664174 |
| H | 6.275981 | -0.50511 | 0.955269 |

## 8.0 N4A dimer coordinates

N4A Hg dimer: 0 degrees

Electronic Energy (EE:) -2580.596075 Hartree

EE + Thermal Free Energy Correction: -2580.128631 Hartree

E (Thermal): 387.765 kcal/mol

Entropy (S): 318.736 cal/mol-kelvin

Imaginary Freq: 0

|   |          |          |          |
|---|----------|----------|----------|
| 0 | 1        |          |          |
| C | 6.720799 | 4.229499 | -0.69825 |
| C | 5.258339 | 4.14667  | -0.81034 |
| C | 6.93866  | -2.6467  | 0.545232 |
| C | 7.616053 | -1.45231 | 0.363738 |
| C | 4.748373 | -1.58202 | 0.232835 |
| C | 5.513181 | -2.71097 | 0.482535 |
| C | 3.334281 | -1.65922 | 0.174559 |
| C | 2.120844 | -1.71133 | 0.125309 |
| C | 9.03387  | -1.40769 | 0.428182 |
| C | 10.23604 | -1.37907 | 0.473355 |
| H | 11.2963  | -1.33692 | 0.518925 |
| O | 4.906739 | -3.92425 | 0.625273 |
| O | 7.631585 | -3.78588 | 0.834518 |
| C | 4.813348 | -4.41123 | 1.976445 |
| H | 4.320913 | -5.38023 | 1.91105  |

|    |          |          |          |
|----|----------|----------|----------|
| H  | 5.805874 | -4.52646 | 2.417048 |
| H  | 4.204383 | -3.73294 | 2.580862 |
| C  | 7.80149  | -4.69731 | -0.2658  |
| H  | 8.361933 | -5.54256 | 0.13074  |
| H  | 6.833781 | -5.03579 | -0.64273 |
| H  | 8.376203 | -4.22193 | -1.06574 |
| N  | 7.505282 | 0.90269  | -0.05973 |
| C  | 6.773844 | 1.981927 | -0.3032  |
| C  | 5.340008 | 1.912934 | -0.38641 |
| N  | 4.688787 | 0.770262 | -0.21918 |
| C  | 5.420843 | -0.32337 | 0.029763 |
| C  | 6.855241 | -0.25565 | 0.110024 |
| N  | 4.607922 | 3.040947 | -0.65365 |
| N  | 7.429841 | 3.178229 | -0.46174 |
| O  | 4.62569  | 5.286922 | -1.11109 |
| O  | 7.365485 | 5.390628 | -0.932   |
| C  | 3.194813 | 5.214112 | -1.27237 |
| H  | 2.938832 | 4.519821 | -2.07326 |
| H  | 2.722667 | 4.878552 | -0.34831 |
| H  | 2.886933 | 6.226627 | -1.52276 |
| C  | 7.112773 | 6.503901 | -0.05611 |
| H  | 7.392547 | 6.243517 | 0.968778 |
| H  | 7.757289 | 7.304434 | -0.41312 |
| H  | 6.070278 | 6.818863 | -0.09926 |
| Hg | 0.082487 | -1.74054 | 0.017403 |
| C  | -1.95673 | -1.76567 | -0.09413 |
| C  | -3.17065 | -1.7448  | -0.15189 |
| C  | -4.58534 | -1.70479 | -0.22358 |
| C  | -5.32001 | -2.86067 | -0.43471 |
| C  | -5.29041 | -0.45529 | -0.07752 |
| C  | -6.74611 | -2.83287 | -0.51174 |
| O  | -4.68511 | -4.06457 | -0.52745 |
| N  | -4.58756 | 0.664191 | 0.13377  |
| C  | -6.72547 | -0.42513 | -0.17302 |
| C  | -7.45432 | -1.64874 | -0.38365 |
| O  | -7.41037 | -3.99644 | -0.76426 |
| C  | -4.5487  | -4.58534 | -1.86236 |
| C  | -5.26548 | 1.797893 | 0.251946 |
| N  | -7.40464 | 0.723754 | -0.05633 |
| C  | -8.87239 | -1.64284 | -0.46225 |
| C  | -7.5482  | -4.88566 | 0.358909 |

|   |          |          |          |
|---|----------|----------|----------|
| H | -4.03669 | -5.54082 | -1.75946 |
| H | -5.528   | -4.7351  | -2.32221 |
| H | -3.94118 | -3.90984 | -2.47117 |
| C | -6.69941 | 1.827091 | 0.151948 |
| N | -4.55417 | 2.94887  | 0.487656 |
| C | -10.0744 | -1.64953 | -0.5193  |
| H | -8.08677 | -5.75531 | -0.01432 |
| H | -6.56964 | -5.18741 | 0.738252 |
| H | -8.13236 | -4.40702 | 1.150052 |
| N | -7.37525 | 3.015223 | 0.261156 |
| C | -5.21083 | 4.053268 | 0.602817 |
| C | -6.67312 | 4.080144 | 0.467962 |
| O | -4.50989 | 5.194915 | 0.75768  |
| O | -7.24983 | 5.2858   | 0.546926 |
| C | -4.73452 | 5.983741 | 1.940251 |
| C | -8.67903 | 5.333689 | 0.367853 |
| H | -4.49862 | 5.395879 | 2.83196  |
| H | -4.04141 | 6.819075 | 1.865912 |
| H | -5.75859 | 6.353533 | 1.986452 |
| H | -8.95079 | 4.943855 | -0.61368 |
| H | -9.17989 | 4.741464 | 1.134699 |
| H | -8.93996 | 6.385912 | 0.454351 |
| H | -11.1348 | -1.64251 | -0.57789 |

N4A Hg dimer: 90 degrees

Electronic Energy (EE:): -2580.595852 Hartree

EE + Thermal Free Energy Correction: -2580.128996 Hartree

E (Thermal): 387.762 kcal/mol

Entropy (S): 319.963 cal/mol-kelvin

Imaginary Freq: 0

|   |          |          |          |
|---|----------|----------|----------|
| 0 | 1        |          |          |
| C | -7.64248 | 2.846531 | 2.509961 |
| C | -6.21107 | 3.168537 | 2.442309 |
| C | -6.47251 | -2.83587 | -1.39005 |
| C | -7.36219 | -2.04775 | -0.67918 |
| C | -4.57915 | -1.35865 | -0.87663 |
| C | -5.08976 | -2.49201 | -1.49063 |
| C | -3.20417 | -1.03166 | -0.98548 |

|    |          |          |          |
|----|----------|----------|----------|
| C  | -2.02642 | -0.74534 | -1.07755 |
| C  | -8.73329 | -2.4058  | -0.58855 |
| C  | -9.89176 | -2.721   | -0.50697 |
| H  | -10.9186 | -2.98225 | -0.43337 |
| O  | -4.25512 | -3.3317  | -2.16718 |
| O  | -6.91986 | -3.94312 | -2.04955 |
| C  | -4.32685 | -3.24904 | -3.60217 |
| H  | -3.61564 | -3.9824  | -3.97906 |
| H  | -5.332   | -3.48868 | -3.95532 |
| H  | -4.03307 | -2.25032 | -3.93772 |
| C  | -6.6417  | -5.19796 | -1.40217 |
| H  | -7.05332 | -5.96728 | -2.05367 |
| H  | -5.56567 | -5.34485 | -1.28561 |
| H  | -7.13902 | -5.23994 | -0.42902 |
| N  | -7.72847 | -0.08949 | 0.649766 |
| C  | -7.23988 | 0.992023 | 1.241791 |
| C  | -5.84432 | 1.327546 | 1.156917 |
| N  | -4.98839 | 0.573304 | 0.481211 |
| C  | -5.47502 | -0.52    | -0.12059 |
| C  | -6.87074 | -0.85721 | -0.03406 |
| N  | -5.36224 | 2.444421 | 1.790068 |
| N  | -8.11489 | 1.794312 | 1.932751 |
| O  | -5.82044 | 4.254288 | 3.120825 |
| O  | -8.48166 | 3.59416  | 3.25536  |
| C  | -4.41185 | 4.558062 | 3.106896 |
| H  | -3.84137 | 3.72953  | 3.527941 |
| H  | -4.07055 | 4.741234 | 2.087266 |
| H  | -4.30925 | 5.451152 | 3.718988 |
| C  | -8.69072 | 4.967505 | 2.880596 |
| H  | -9.11302 | 5.019327 | 1.872912 |
| H  | -9.41402 | 5.35534  | 3.594826 |
| H  | -7.76696 | 5.543272 | 2.93792  |
| Hg | -0.05471 | -0.22794 | -1.19381 |
| C  | 1.916169 | 0.295456 | -1.31007 |
| C  | 3.095217 | 0.588812 | -1.34414 |
| C  | 4.473726 | 0.916622 | -1.37037 |
| C  | 4.98478  | 1.771561 | -2.33374 |
| C  | 5.374664 | 0.364588 | -0.38887 |
| C  | 6.372343 | 2.108837 | -2.36903 |
| O  | 4.149579 | 2.347459 | -3.24606 |
| N  | 4.886649 | -0.45822 | 0.547471 |

|   |          |          |          |
|---|----------|----------|----------|
| C | 6.774882 | 0.690305 | -0.43558 |
| C | 7.266278 | 1.591095 | -1.4455  |
| O | 6.822708 | 2.92235  | -3.36647 |
| C | 4.18584  | 1.767704 | -4.56281 |
| C | 5.743248 | -0.95851 | 1.427598 |
| N | 7.636099 | 0.180112 | 0.454996 |
| C | 8.641927 | 1.940515 | -1.49729 |
| C | 6.547911 | 4.324084 | -3.19149 |
| H | 3.479208 | 2.340736 | -5.16119 |
| H | 5.186708 | 1.84464  | -4.9932  |
| H | 3.867273 | 0.722143 | -4.52425 |
| C | 7.143159 | -0.63434 | 1.377883 |
| N | 5.24875  | -1.79039 | 2.401818 |
| C | 9.803736 | 2.251017 | -1.54251 |
| H | 6.961409 | 4.820246 | -4.06815 |
| H | 5.472559 | 4.50517  | -3.1329  |
| H | 7.046368 | 4.697456 | -2.29238 |
| N | 8.010361 | -1.17721 | 2.290916 |
| C | 6.079313 | -2.27916 | 3.259539 |
| C | 7.512836 | -1.96679 | 3.184766 |
| O | 5.609316 | -3.15774 | 4.167261 |
| O | 8.294837 | -2.57007 | 4.088425 |
| C | 5.746732 | -2.84509 | 5.565386 |
| C | 9.70971  | -2.31213 | 3.996889 |
| H | 5.224288 | -1.91134 | 5.792345 |
| H | 5.263872 | -3.66504 | 6.092728 |
| H | 6.793821 | -2.77842 | 5.859822 |
| H | 10.08996 | -2.62812 | 3.024877 |
| H | 9.913046 | -1.24853 | 4.127516 |
| H | 10.1563  | -2.89658 | 4.797958 |
| H | 10.83292 | 2.510505 | -1.57909 |

N4A Hg dimer: 180 degrees

Electronic Energy (EE:) -2580.596060 Hartree

EE + Thermal Free Energy Correction: -2580.128613 Hartree

E (Thermal): 387.765 kcal/mol

Entropy (S): 318.733 cal/mol-kelvin

Imaginary Freq: 0

|    |          |          |          |
|----|----------|----------|----------|
| 0  | 1        |          |          |
| C  | 8.674395 | -2.64207 | -0.02553 |
| C  | 7.327136 | -3.22459 | 0.02125  |
| C  | 5.836306 | 3.745845 | 0.057474 |
| C  | 6.971066 | 2.951911 | 0.044701 |
| C  | 4.338383 | 1.799605 | 0.051224 |
| C  | 4.527672 | 3.173207 | 0.058598 |
| C  | 3.032012 | 1.24966  | 0.050478 |
| C  | 1.910864 | 0.780008 | 0.045767 |
| C  | 8.26436  | 3.538148 | 0.045487 |
| C  | 9.357273 | 4.041597 | 0.057032 |
| H  | 10.32816 | 4.472148 | 0.05844  |
| O  | 3.450388 | 4.006653 | 0.117383 |
| O  | 5.955489 | 5.104172 | 0.023238 |
| C  | 3.100344 | 4.651802 | -1.12105 |
| H  | 2.238217 | 5.27817  | -0.89771 |
| H  | 3.925606 | 5.267984 | -1.48414 |
| H  | 2.82356  | 3.904903 | -1.87043 |
| C  | 5.743259 | 5.772448 | 1.279974 |
| H  | 5.867281 | 6.835078 | 1.077103 |
| H  | 4.736531 | 5.579973 | 1.657203 |
| H  | 6.491258 | 5.450973 | 2.010264 |
| N  | 7.909285 | 0.749013 | 0.011354 |
| C  | 7.729383 | -0.56493 | 0.00972  |
| C  | 6.412417 | -1.14157 | 0.02946  |
| N  | 5.323249 | -0.38546 | 0.04673  |
| C  | 5.497231 | 0.94277  | 0.046913 |
| C  | 6.81484  | 1.519987 | 0.029113 |
| N  | 6.254464 | -2.50392 | 0.040523 |
| N  | 8.846259 | -1.3639  | -0.02394 |
| O  | 7.266878 | -4.5612  | 0.066929 |
| O  | 9.766408 | -3.43226 | 0.021836 |
| C  | 5.955529 | -5.15004 | 0.162977 |
| H  | 5.450156 | -4.80456 | 1.065496 |
| H  | 5.352015 | -4.88268 | -0.7054  |
| H  | 6.12949  | -6.22292 | 0.201756 |
| C  | 10.00245 | -4.33576 | -1.07271 |
| H  | 10.1281  | -3.77192 | -2.00155 |
| H  | 10.93276 | -4.84587 | -0.83186 |
| H  | 9.196098 | -5.06251 | -1.17276 |
| Hg | 0.043413 | -0.04494 | 0.047707 |

|   |          |          |          |
|---|----------|----------|----------|
| C | -1.82538 | -0.86863 | 0.048164 |
| C | -2.95541 | -1.31625 | 0.052224 |
| C | -4.28071 | -1.81781 | 0.052019 |
| C | -4.52768 | -3.18008 | 0.109495 |
| C | -5.40321 | -0.91425 | -0.00658 |
| C | -5.85969 | -3.69585 | 0.109862 |
| O | -3.48824 | -4.05759 | 0.214938 |
| N | -5.17188 | 0.403266 | -0.05693 |
| C | -6.74403 | -1.43472 | -0.02355 |
| C | -6.96037 | -2.85633 | 0.047646 |
| O | -6.03769 | -5.04766 | 0.125238 |
| C | -3.14237 | -4.74724 | -0.99985 |
| C | -6.22522 | 1.206401 | -0.12117 |
| N | -7.80436 | -0.61854 | -0.09131 |
| C | -8.27675 | -3.3895  | 0.050872 |
| C | -5.85712 | -5.67961 | 1.405562 |
| H | -2.31424 | -5.40638 | -0.74388 |
| H | -3.98689 | -5.33519 | -1.36602 |
| H | -2.81738 | -4.03227 | -1.76099 |
| C | -7.56482 | 0.684624 | -0.14077 |
| N | -5.99787 | 2.560301 | -0.15533 |
| C | -9.38845 | -3.85011 | 0.065191 |
| H | -6.02568 | -6.74246 | 1.239356 |
| H | -4.84437 | -5.51657 | 1.78017  |
| H | -6.59308 | -5.30127 | 2.120718 |
| N | -8.63638 | 1.536327 | -0.22262 |
| C | -7.02042 | 3.344485 | -0.21717 |
| C | -8.38512 | 2.803144 | -0.2668  |
| O | -6.79756 | 4.669276 | -0.32946 |
| O | -9.3707  | 3.70109  | -0.3869  |
| C | -7.32046 | 5.544096 | 0.686782 |
| C | -10.7117 | 3.182652 | -0.48604 |
| H | -6.89972 | 5.278432 | 1.660808 |
| H | -6.98492 | 6.541126 | 0.409396 |
| H | -8.40928 | 5.513737 | 0.719769 |
| H | -10.8025 | 2.531873 | -1.35637 |
| H | -10.9684 | 2.614417 | 0.40888  |
| H | -11.3472 | 4.059309 | -0.58786 |
| H | -10.3738 | -4.24623 | 0.067483 |

## 9.0 N4A dimer (0 degrees) radical anion coordinates

Electronic Energy (EE:): -2580.684830 Hartree

EE + Thermal Free Energy Correction: -2580.219399 Hartree

E (Thermal): 385.926 kcal/mol

Entropy (S): 316.809 cal/mol-kelvin

Imaginary Freq: 0

|    |          |          |          |
|----|----------|----------|----------|
| -1 | 2        |          |          |
| C  | 7.021856 | 4.152664 | -0.30797 |
| C  | 5.584926 | 4.183171 | -0.35508 |
| C  | 6.800541 | -2.83649 | 0.21772  |
| C  | 7.560786 | -1.66625 | 0.141001 |
| C  | 4.698221 | -1.59133 | 0.06775  |
| C  | 5.394431 | -2.80125 | 0.172877 |
| C  | 3.284258 | -1.58176 | 0.039058 |
| C  | 2.065533 | -1.58724 | 0.024087 |
| C  | 8.978348 | -1.73152 | 0.177568 |
| C  | 10.18149 | -1.8039  | 0.195848 |
| H  | 11.24145 | -1.84296 | 0.222237 |
| O  | 4.704116 | -3.99026 | 0.197901 |
| O  | 7.430253 | -4.04749 | 0.382262 |
| C  | 4.486113 | -4.51806 | 1.511166 |
| H  | 3.925655 | -5.44427 | 1.379835 |
| H  | 5.438224 | -4.73002 | 2.006461 |
| H  | 3.894994 | -3.82098 | 2.113311 |
| C  | 7.54187  | -4.82653 | -0.81352 |
| H  | 8.065144 | -5.74151 | -0.53326 |
| H  | 6.55384  | -5.07346 | -1.21127 |
| H  | 8.128087 | -4.29194 | -1.56817 |
| N  | 7.617182 | 0.723141 | -0.03225 |
| C  | 6.951404 | 1.8761   | -0.13901 |
| C  | 5.511586 | 1.911639 | -0.18378 |
| N  | 4.781955 | 0.797256 | -0.11958 |
| C  | 5.445015 | -0.36553 | -0.01192 |
| C  | 6.88807  | -0.40267 | 0.032539 |
| N  | 4.857694 | 3.104408 | -0.29331 |
| N  | 7.67495  | 3.032655 | -0.19941 |
| O  | 5.005251 | 5.401089 | -0.4698  |
| O  | 7.735011 | 5.311763 | -0.43433 |
| C  | 3.573808 | 5.417779 | -0.54096 |



|    |          |          |          |
|----|----------|----------|----------|
| H  | 3.221358 | 4.847623 | -1.40256 |
| H  | 3.132261 | 4.987786 | 0.360326 |
| H  | 3.30457  | 6.468531 | -0.63907 |
| C  | 7.743773 | 6.153564 | 0.721071 |
| H  | 8.194559 | 5.632175 | 1.572577 |
| H  | 8.355593 | 7.018138 | 0.463453 |
| H  | 6.7342   | 6.486566 | 0.977955 |
| Hg | 0.029697 | -1.57356 | -0.00781 |
| C  | -2.00992 | -1.58754 | -0.03795 |
| C  | -3.22844 | -1.58423 | -0.05061 |
| C  | -4.64253 | -1.59677 | -0.07455 |
| C  | -5.33795 | -2.80764 | -0.14589 |
| C  | -5.39303 | -0.37038 | -0.02379 |
| C  | -6.7462  | -2.84552 | -0.18293 |
| O  | -4.64977 | -3.99707 | -0.14569 |
| N  | -4.73246 | 0.796584 | 0.049906 |
| C  | -6.83378 | -0.41048 | -0.05992 |
| C  | -7.5073  | -1.67532 | -0.13165 |
| O  | -7.37567 | -4.05879 | -0.31626 |
| C  | -4.41567 | -4.54422 | -1.44896 |
| C  | -5.46118 | 1.909552 | 0.089474 |
| N  | -7.5633  | 0.718766 | -0.01926 |
| C  | -8.92525 | -1.74235 | -0.15907 |
| C  | -7.46121 | -4.8245  | 0.89111  |
| H  | -3.8587  | -5.46909 | -1.29675 |
| H  | -5.36202 | -4.76188 | -1.95287 |
| H  | -3.81575 | -3.85675 | -2.05302 |
| C  | -6.89882 | 1.869125 | 0.054466 |
| N  | -4.8055  | 3.109181 | 0.165748 |
| C  | -10.1283 | -1.81604 | -0.16912 |
| H  | -7.98606 | -5.74422 | 0.630759 |
| H  | -6.46512 | -5.06273 | 1.272818 |
| H  | -8.0357  | -4.28291 | 1.649761 |
| N  | -7.62259 | 3.032089 | 0.096215 |
| C  | -5.52162 | 4.190444 | 0.203843 |
| C  | -6.96777 | 4.149869 | 0.167807 |
| O  | -4.95528 | 5.408341 | 0.279172 |
| O  | -7.60477 | 5.335287 | 0.21268  |
| C  | -3.52174 | 5.438088 | 0.314231 |
| C  | -9.03578 | 5.283056 | 0.175979 |
| H  | -3.10165 | 4.986036 | -0.58634 |

|   |          |          |          |
|---|----------|----------|----------|
| H | -3.26048 | 6.493221 | 0.374654 |
| H | -3.14305 | 4.894951 | 1.182249 |
| H | -9.38411 | 4.807135 | -0.74309 |
| H | -9.42623 | 4.718459 | 1.025289 |
| H | -9.36066 | 6.321352 | 0.220315 |
| H | -11.1882 | -1.86141 | -0.18998 |

## 10.0 N6P-Br dimer (0 degrees) radical anion coordinates

Electronic Energy (EE:) -13556.154428 Hartree

EE + Thermal Free Energy Correction: -13555.571609 Hartree

E (Thermal): 487.418 kcal/mol

Entropy (S): 410.147 cal/mol-kelvin

Imaginary Freq: 0

|    |          |          |          |
|----|----------|----------|----------|
| -1 | 2        |          |          |
| C  | -7.811   | -5.72711 | -0.38385 |
| C  | -8.37989 | -4.46973 | -0.22629 |
| C  | -5.60294 | -4.72302 | -0.45505 |
| C  | -6.4074  | -5.85466 | -0.49779 |
| O  | -5.86714 | -7.10886 | -0.60372 |
| O  | -8.58745 | -6.8514  | -0.4795  |
| C  | -5.91038 | -7.66916 | -1.924   |
| H  | -5.44608 | -8.65239 | -1.84983 |
| H  | -6.94303 | -7.77119 | -2.26734 |
| H  | -5.33926 | -7.05052 | -2.62279 |
| C  | -8.64566 | -7.64325 | 0.715745 |
| H  | -9.29336 | -8.48915 | 0.485597 |
| H  | -7.65109 | -8.00176 | 0.991808 |
| H  | -9.08069 | -7.06645 | 1.537785 |
| N  | -8.15915 | -2.07419 | -0.03747 |
| C  | -7.36346 | -1.03848 | -0.00054 |
| C  | -5.93461 | -1.1688  | -0.10877 |
| N  | -5.35569 | -2.3319  | -0.2509  |
| C  | -6.16075 | -3.43524 | -0.29378 |
| C  | -7.58284 | -3.30496 | -0.18573 |
| C  | -6.66052 | 6.061604 | 0.546829 |
| C  | -7.49756 | 4.932841 | 0.502367 |
| C  | -4.65639 | 4.67898  | 0.301603 |
| C  | -5.27151 | 5.938451 | 0.439472 |
| C  | -3.2494  | 4.585061 | 0.205722 |
| C  | -8.90553 | 5.081831 | 0.602084 |

|    |          |          |          |
|----|----------|----------|----------|
| C  | -10.1012 | 5.2194   | 0.673735 |
| H  | -11.1539 | 5.330249 | 0.749304 |
| O  | -4.50102 | 7.076572 | 0.432948 |
| O  | -7.21489 | 7.30362  | 0.740956 |
| C  | -4.18346 | 7.5822   | 1.735367 |
| H  | -3.56818 | 8.468417 | 1.577767 |
| H  | -5.09381 | 7.856216 | 2.27641  |
| H  | -3.61285 | 6.843846 | 2.307181 |
| C  | -7.31966 | 8.102032 | -0.44346 |
| H  | -7.78149 | 9.041145 | -0.13708 |
| H  | -6.33227 | 8.297347 | -0.86979 |
| H  | -7.95852 | 7.610182 | -1.18436 |
| N  | -7.70812 | 2.541727 | 0.326573 |
| C  | -7.12107 | 1.380836 | 0.189949 |
| C  | -5.70516 | 1.251694 | 0.084295 |
| N  | -4.90791 | 2.289244 | 0.117301 |
| C  | -5.48476 | 3.516645 | 0.25707  |
| C  | -6.9052  | 3.645111 | 0.36422  |
| N  | -5.17499 | -0.02177 | -0.05871 |
| N  | -7.88739 | 0.22624  | 0.144916 |
| H  | -8.89197 | 0.321669 | 0.219947 |
| H  | -4.16957 | -0.11143 | -0.13477 |
| Br | -10.2777 | -4.32505 | -0.06894 |
| Br | -3.71241 | -4.9228  | -0.61267 |
| C  | 3.249462 | 4.585018 | -0.20599 |
| C  | 4.656464 | 4.678929 | -0.30171 |
| C  | 5.271613 | 5.938397 | -0.43949 |
| C  | 5.48482  | 3.516585 | -0.2571  |
| C  | 6.660636 | 6.06154  | -0.54667 |
| O  | 4.501137 | 7.076524 | -0.43303 |
| N  | 4.907941 | 2.289186 | -0.11743 |
| C  | 6.905278 | 3.645042 | -0.36406 |
| C  | 7.497668 | 4.932771 | -0.50211 |
| O  | 7.215038 | 7.303554 | -0.74072 |
| C  | 4.183735 | 7.582179 | -1.73548 |
| C  | 5.705185 | 1.251628 | -0.08435 |
| N  | 7.708185 | 2.541653 | -0.32633 |
| C  | 8.905645 | 5.081752 | -0.60165 |
| C  | 7.319663 | 8.101956 | 0.443719 |
| H  | 3.568441 | 8.468397 | -1.57794 |
| H  | 5.094156 | 7.856199 | -2.27641 |

|    |          |          |          |
|----|----------|----------|----------|
| H  | 3.613194 | 6.843841 | -2.30738 |
| C  | 7.12111  | 1.380763 | -0.18981 |
| N  | 5.174979 | -0.02183 | 0.05855  |
| C  | 10.10135 | 5.219318 | -0.67314 |
| H  | 7.781535 | 9.041069 | 0.1374   |
| H  | 6.332226 | 8.297273 | 0.869924 |
| H  | 7.958428 | 7.610097 | 1.184689 |
| N  | 7.887414 | 0.226161 | -0.14469 |
| C  | 5.934583 | -1.16887 | 0.108694 |
| H  | 4.169554 | -0.11149 | 0.134471 |
| C  | 7.363448 | -1.03856 | 0.000673 |
| H  | 8.892005 | 0.321583 | -0.21957 |
| N  | 5.355641 | -2.33197 | 0.25072  |
| N  | 8.159131 | -2.07428 | 0.03771  |
| C  | 6.160683 | -3.43531 | 0.293692 |
| C  | 7.582786 | -3.30504 | 0.185863 |
| C  | 5.602841 | -4.72309 | 0.454851 |
| C  | 8.379828 | -4.46982 | 0.22652  |
| C  | 6.40729  | -5.85474 | 0.497682 |
| Br | 3.712291 | -4.92286 | 0.612188 |
| C  | 7.810904 | -5.7272  | 0.383961 |
| Br | 10.2777  | -4.32514 | 0.069469 |
| O  | 5.867004 | -7.10894 | 0.603499 |
| O  | 8.58734  | -6.8515  | 0.479696 |
| C  | 5.910026 | -7.66927 | 1.923783 |
| C  | 8.64572  | -7.64332 | -0.71556 |
| H  | 5.445731 | -8.65249 | 1.849523 |
| H  | 6.942621 | -7.7713  | 2.267283 |
| H  | 5.338791 | -7.05063 | 2.622488 |
| H  | 9.293381 | -8.48923 | -0.48533 |
| H  | 7.651192 | -8.00182 | -0.99177 |
| H  | 9.080871 | -7.06651 | -1.53752 |
| H  | 11.15403 | 5.330221 | -0.74852 |
| C  | -2.03313 | 4.537637 | 0.131171 |
| Hg | 0.000031 | 4.510369 | -0.00016 |
| C  | 2.03319  | 4.537603 | -0.13148 |

### 11.0 N6P-Bu dimer (180 degrees) radical anion coordinates

Electronic Energy (EE:) -4195.886713 Hartree  
 EE + Thermal Free Energy Correction: -4194.814599 Hartree  
 E (Thermal): 833.721 kcal/mol

Entropy (S): 541.848 cal/mol-kelvin

Imaginary Freq: 0

| -1 | 2        |          |          |
|----|----------|----------|----------|
| C  | -11.7009 | 2.904892 | 0.089732 |
| C  | -10.3175 | 2.677224 | 0.09113  |
| C  | -12.1733 | 0.508579 | 0.022177 |
| C  | -12.6129 | 1.83947  | 0.060434 |
| O  | -13.9612 | 2.107381 | 0.109886 |
| O  | -12.1775 | 4.195222 | 0.079261 |
| C  | -14.5293 | 2.51994  | -1.13822 |
| H  | -15.5908 | 2.684999 | -0.95056 |
| H  | -14.068  | 3.447072 | -1.48892 |
| H  | -14.4131 | 1.735123 | -1.89289 |
| C  | -12.6184 | 4.672426 | 1.35548  |
| H  | -12.9535 | 5.698263 | 1.198846 |
| H  | -13.4472 | 4.066847 | 1.732501 |
| H  | -11.7933 | 4.667583 | 2.074966 |
| N  | -8.49757 | 1.099762 | 0.048317 |
| C  | -8.10577 | -0.1465  | 0.020636 |
| C  | -9.0405  | -1.23822 | -0.00524 |
| N  | -10.3325 | -1.04514 | -0.00277 |
| C  | -10.7722 | 0.250641 | 0.026583 |
| C  | -9.84558 | 1.333148 | 0.051813 |
| C  | -2.67872 | -4.8177  | -0.07295 |
| C  | -3.11534 | -3.47929 | -0.05178 |
| C  | -4.97675 | -5.64881 | -0.08699 |
| C  | -3.58964 | -5.87881 | -0.09943 |
| C  | -5.88275 | -6.74131 | -0.10309 |
| C  | -6.64424 | -7.67621 | -0.10298 |
| H  | -7.32096 | -8.49347 | -0.11588 |
| C  | -2.17645 | -2.42301 | -0.03859 |
| C  | -1.35684 | -1.51999 | -0.03654 |
| O  | -3.12211 | -7.16814 | -0.18129 |
| O  | -1.33337 | -5.09545 | -0.03005 |
| C  | -2.64648 | -7.71059 | 1.056036 |
| H  | -2.32318 | -8.72875 | 0.837122 |
| H  | -1.80341 | -7.12898 | 1.437665 |
| H  | -3.45071 | -7.73872 | 1.798651 |
| C  | -0.73913 | -5.34111 | -1.31034 |
| H  | 0.317655 | -5.53479 | -1.12496 |

|   |          |          |          |
|---|----------|----------|----------|
| H | -1.19606 | -6.21267 | -1.78807 |
| H | -0.83707 | -4.46278 | -1.95588 |
| N | -4.96058 | -1.92954 | -0.0161  |
| C | -6.25478 | -1.73655 | -0.01298 |
| C | -7.18276 | -2.821   | -0.03675 |
| N | -6.79447 | -4.06977 | -0.06296 |
| C | -5.44932 | -4.3053  | -0.06671 |
| C | -4.51974 | -3.21965 | -0.04205 |
| N | -8.53527 | -2.52179 | -0.03242 |
| N | -6.7596  | -0.44686 | 0.014796 |
| H | -6.10002 | 0.320221 | 0.033934 |
| H | -9.19086 | -3.29207 | -0.04942 |
| C | -13.1104 | -0.55857 | -0.01226 |
| C | -9.4082  | 3.767933 | 0.12399  |
| C | -8.63037 | 4.691365 | 0.157783 |
| C | -13.9029 | -1.4693  | -0.0484  |
| C | -14.8454 | -2.59551 | -0.07652 |
| C | -7.66264 | 5.796336 | 0.181334 |
| C | -14.0543 | -3.92042 | 0.019189 |
| H | -13.4767 | -3.95941 | 0.945284 |
| H | -14.7403 | -4.77345 | -0.00007 |
| H | -13.3572 | -4.01547 | -0.81621 |
| C | -15.6489 | -2.56665 | -1.39789 |
| H | -16.2152 | -1.63646 | -1.48729 |
| H | -14.9811 | -2.64258 | -2.25906 |
| H | -16.3528 | -3.40462 | -1.43064 |
| C | -7.14876 | 6.055499 | -1.25493 |
| H | -6.42152 | 6.873809 | -1.25309 |
| H | -6.66523 | 5.163631 | -1.65923 |
| H | -7.9732  | 6.325483 | -1.91898 |
| C | -6.47375 | 5.414497 | 1.093534 |
| H | -5.73524 | 6.222224 | 1.11063  |
| H | -6.81185 | 5.232785 | 2.116334 |
| H | -5.98648 | 4.506223 | 0.733029 |
| C | -15.8183 | -2.48277 | 1.120448 |
| H | -15.2724 | -2.50743 | 2.066204 |
| H | -16.3783 | -1.54568 | 1.077392 |
| H | -16.5301 | -3.31467 | 1.10888  |
| C | -8.3464  | 7.072514 | 0.72299  |
| H | -9.19646 | 7.352342 | 0.096275 |
| H | -8.71167 | 6.914694 | 1.74063  |

|    |          |          |          |
|----|----------|----------|----------|
| H  | -7.63577 | 7.904977 | 0.736684 |
| Hg | -5.1E-05 | -0.00029 | -0.03275 |
| C  | 1.35673  | 1.519423 | -0.03657 |
| C  | 2.176301 | 2.422474 | -0.03864 |
| C  | 3.115087 | 3.478847 | -0.0518  |
| C  | 2.678334 | 4.817208 | -0.07299 |
| C  | 4.519512 | 3.219346 | -0.04204 |
| C  | 3.589154 | 5.878413 | -0.09945 |
| O  | 1.33296  | 5.094828 | -0.03011 |
| N  | 4.960479 | 1.929273 | -0.01607 |
| C  | 5.448987 | 4.305087 | -0.06669 |
| C  | 4.976285 | 5.648552 | -0.08699 |
| O  | 3.121492 | 7.167694 | -0.18132 |
| C  | 0.738717 | 5.340436 | -1.31041 |
| C  | 6.254697 | 1.736421 | -0.01293 |
| N  | 6.794157 | 4.069691 | -0.06292 |
| C  | 5.88218  | 6.741141 | -0.10308 |
| C  | 2.645794 | 7.710102 | 1.055997 |
| H  | -0.31809 | 5.534021 | -1.12505 |
| H  | 1.195585 | 6.212043 | -1.78813 |
| H  | 0.836753 | 4.462122 | -1.95595 |
| C  | 7.182574 | 2.820962 | -0.03669 |
| N  | 6.75965  | 0.446779 | 0.014869 |
| C  | 6.643572 | 7.676111 | -0.10295 |
| H  | 2.322394 | 8.728226 | 0.837075 |
| H  | 1.802778 | 7.128409 | 1.43762  |
| H  | 3.450013 | 7.738318 | 1.798621 |
| N  | 8.535113 | 2.521883 | -0.03234 |
| C  | 8.105845 | 0.146547 | 0.020694 |
| H  | 6.100142 | -0.32037 | 0.033998 |
| C  | 9.040467 | 1.238359 | -0.00519 |
| H  | 9.190625 | 3.292225 | -0.04936 |
| N  | 8.497775 | -1.09967 | 0.048364 |
| N  | 10.3325  | 1.045408 | -0.00273 |
| C  | 9.845805 | -1.33293 | 0.051842 |
| C  | 10.77232 | -0.25033 | 0.026604 |
| C  | 10.31783 | -2.67696 | 0.091138 |
| C  | 12.17343 | -0.50813 | 0.02217  |
| C  | 11.70132 | -2.90449 | 0.089707 |
| C  | 9.408663 | -3.76776 | 0.124012 |
| C  | 12.61319 | -1.83897 | 0.060402 |

|   |          |          |          |
|---|----------|----------|----------|
| C | 13.11043 | 0.559115 | -0.01228 |
| O | 12.17799 | -4.19477 | 0.079213 |
| C | 8.630936 | -4.69127 | 0.157818 |
| O | 13.96147 | -2.10675 | 0.109819 |
| C | 13.90282 | 1.469925 | -0.04841 |
| C | 12.61904 | -4.67193 | 1.355412 |
| C | 7.663347 | -5.79636 | 0.181352 |
| C | 14.52957 | -2.51924 | -1.13831 |
| C | 14.84527 | 2.596217 | -0.07653 |
| H | 12.9542  | -5.69774 | 1.198759 |
| H | 13.44777 | -4.06627 | 1.732405 |
| H | 11.79389 | -4.66718 | 2.07493  |
| C | 6.473821 | -5.41419 | 1.092583 |
| C | 8.346941 | -7.07215 | 0.724144 |
| C | 7.150417 | -6.05639 | -1.2551  |
| H | 15.59112 | -2.6842  | -0.95067 |
| H | 14.0684  | -3.44641 | -1.489   |
| H | 14.41327 | -1.73442 | -1.89296 |
| C | 15.81842 | 2.483375 | 1.120241 |
| C | 14.0541  | 3.921045 | 0.019507 |
| C | 15.64854 | 2.567609 | -1.39805 |
| H | 5.986658 | -4.50618 | 0.731269 |
| H | 5.735409 | -6.22201 | 1.109651 |
| H | 6.811243 | -5.23187 | 2.115498 |
| H | 9.197433 | -7.35221 | 0.09812  |
| H | 8.711547 | -6.91372 | 1.741928 |
| H | 7.636412 | -7.9047  | 0.737848 |
| H | 6.667006 | -5.16482 | -1.66019 |
| H | 7.975326 | -6.32661 | -1.91847 |
| H | 6.423311 | -6.87482 | -1.25328 |
| H | 16.53015 | 3.315335 | 1.108672 |
| H | 15.27263 | 2.507851 | 2.066098 |
| H | 16.37842 | 1.546338 | 1.076946 |
| H | 14.74002 | 4.774133 | 0.000251 |
| H | 13.35685 | 4.016159 | -0.81575 |
| H | 13.47666 | 3.959852 | 0.945711 |
| H | 16.21484 | 1.637478 | -1.48769 |
| H | 14.98058 | 2.643608 | -2.2591  |
| H | 16.35235 | 3.405644 | -1.43081 |
| H | 7.320205 | 8.493448 | -0.11582 |



## 12.0 N6P-Ph dimer (180 degrees) radical anion coordinates

Electronic Energy (EE:)-4491.141211 Hartree

EE + Thermal Free Energy Correction: -4490.189219 Hartree

E (Thermal): 753.284 kcal/mol

Entropy (S): 524.879 cal/mol-kelvin

Imaginary Freq: 0

| -1 | 2        |          |          |
|----|----------|----------|----------|
| C  | 12.55435 | 2.104505 | -0.20491 |
| C  | 12.14544 | 0.759218 | -0.12524 |
| C  | 10.23751 | 2.885636 | -0.23145 |
| C  | 11.62138 | 3.144189 | -0.25334 |
| O  | 12.06282 | 4.445525 | -0.28801 |
| O  | 13.89578 | 2.396276 | -0.27405 |
| C  | 12.48623 | 4.893125 | -1.58198 |
| H  | 12.7971  | 5.930933 | -1.45862 |
| H  | 13.32748 | 4.296053 | -1.94404 |
| H  | 11.65769 | 4.846074 | -2.2959  |
| C  | 14.46595 | 2.86182  | 0.955641 |
| H  | 15.52206 | 3.041769 | 0.75258  |
| H  | 13.98844 | 3.79038  | 1.279136 |
| H  | 14.3722  | 2.099877 | 1.736201 |
| N  | 10.3373  | -0.83155 | -0.0334  |
| C  | 9.049274 | -1.05328 | -0.00597 |
| C  | 8.093479 | 0.01289  | -0.04562 |
| N  | 8.45696  | 1.266795 | -0.11502 |
| C  | 9.795914 | 1.530409 | -0.14625 |
| C  | 10.74772 | 0.468911 | -0.1039  |
| C  | 3.709489 | -5.80733 | 0.30834  |
| C  | 5.087669 | -5.54664 | 0.261491 |
| C  | 3.181784 | -3.42141 | 0.217567 |
| C  | 2.773296 | -4.76413 | 0.280311 |
| C  | 2.219921 | -2.38298 | 0.202625 |
| C  | 1.384568 | -1.49631 | 0.199547 |
| C  | 6.018887 | -6.61894 | 0.282643 |
| C  | 6.80042  | -7.53619 | 0.28777  |
| H  | 7.49552  | -8.33807 | 0.303628 |
| O  | 1.434783 | -5.06879 | 0.275976 |
| O  | 3.271746 | -7.10262 | 0.42712  |
| C  | 0.882146 | -5.33893 | 1.571332 |
| H  | -0.17417 | -5.55602 | 1.412913 |

|   |          |          |          |
|---|----------|----------|----------|
| H | 1.372627 | -6.20247 | 2.028972 |
| H | 0.977547 | -4.46286 | 2.220183 |
| C | 2.777633 | -7.6823  | -0.78725 |
| H | 2.477591 | -8.70001 | -0.5369  |
| H | 1.916319 | -7.12415 | -1.1627  |
| H | 3.56584  | -7.71376 | -1.54639 |
| N | 6.870507 | -3.93105 | 0.163879 |
| C | 7.232483 | -2.67812 | 0.09916  |
| C | 6.276047 | -1.6101  | 0.065497 |
| N | 4.989431 | -1.83233 | 0.100463 |
| C | 4.578214 | -3.13241 | 0.168784 |
| C | 5.529935 | -4.19461 | 0.20029  |
| N | 6.751398 | -0.31464 | -0.00705 |
| N | 8.574404 | -2.34966 | 0.062429 |
| H | 9.248489 | -3.10367 | 0.087631 |
| H | 6.076352 | 0.438763 | -0.03233 |
| C | 9.310659 | 3.948134 | -0.28681 |
| C | 13.10339 | -0.27565 | -0.07631 |
| C | 13.92902 | -1.16197 | -0.0255  |
| C | 8.513034 | 4.859057 | -0.3466  |
| C | 7.562084 | 5.909654 | -0.41065 |
| C | 6.184971 | 5.62416  | -0.50039 |
| C | 7.968655 | 7.258449 | -0.38722 |
| C | 5.253464 | 6.652333 | -0.56522 |
| H | 5.866341 | 4.589079 | -0.51873 |
| C | 7.029312 | 8.279836 | -0.45235 |
| H | 9.025503 | 7.4856   | -0.3142  |
| C | 5.668865 | 7.984127 | -0.54194 |
| H | 4.197801 | 6.414074 | -0.63523 |
| H | 7.359385 | 9.312943 | -0.43221 |
| H | 4.938578 | 8.783849 | -0.59275 |
| C | 14.88006 | -2.21258 | 0.027269 |
| C | 14.46366 | -3.54978 | 0.185386 |
| C | 16.26019 | -1.94754 | -0.07693 |
| C | 15.39552 | -4.5783  | 0.237554 |
| H | 13.40405 | -3.75997 | 0.265181 |
| C | 17.18444 | -2.9832  | -0.02329 |
| H | 16.588   | -0.92264 | -0.20298 |
| C | 16.75942 | -4.30265 | 0.13428  |
| H | 15.05653 | -5.60137 | 0.359431 |
| H | 18.24292 | -2.76073 | -0.10599 |

|    |          |          |          |
|----|----------|----------|----------|
| H  | 17.48378 | -5.10838 | 0.175383 |
| Hg | -1.9E-05 | 0.000071 | 0.195068 |
| C  | -1.38461 | 1.496449 | 0.199486 |
| C  | -2.21996 | 2.383122 | 0.202533 |
| C  | -3.18184 | 3.421529 | 0.217442 |
| C  | -2.77339 | 4.764266 | 0.280154 |
| C  | -4.57827 | 3.132501 | 0.168666 |
| C  | -3.70961 | 5.80744  | 0.308153 |
| O  | -1.43488 | 5.068956 | 0.275819 |
| N  | -4.98945 | 1.832407 | 0.100378 |
| C  | -5.53001 | 4.194671 | 0.200145 |
| C  | -5.08778 | 5.546717 | 0.261308 |
| O  | -3.2719  | 7.102742 | 0.426901 |
| C  | -0.88225 | 5.339107 | 1.571174 |
| C  | -6.27606 | 1.610148 | 0.065419 |
| N  | -6.87058 | 3.931079 | 0.163744 |
| C  | -6.01902 | 6.618994 | 0.282431 |
| C  | -2.77778 | 7.682403 | -0.78748 |
| H  | 0.174062 | 5.556229 | 1.412758 |
| H  | -1.37276 | 6.20264  | 2.028811 |
| H  | -0.97764 | 4.463046 | 2.220028 |
| C  | -7.23252 | 2.678139 | 0.099059 |
| N  | -6.75138 | 0.314668 | -0.0071  |
| C  | -6.80058 | 7.536226 | 0.287536 |
| H  | -2.47778 | 8.700128 | -0.53716 |
| H  | -1.91644 | 7.124268 | -1.1629  |
| H  | -3.56598 | 7.713819 | -1.54663 |
| N  | -8.57444 | 2.349651 | 0.062342 |
| C  | -8.09346 | -0.01289 | -0.04567 |
| H  | -6.07632 | -0.43872 | -0.03238 |
| C  | -9.04928 | 1.053253 | -0.00603 |
| H  | -9.24854 | 3.103643 | 0.087527 |
| N  | -8.45691 | -1.26681 | -0.11506 |
| N  | -10.3373 | 0.831491 | -0.03346 |
| C  | -9.79585 | -1.53045 | -0.14627 |
| C  | -10.7477 | -0.46898 | -0.10393 |
| C  | -10.2374 | -2.88569 | -0.23146 |
| C  | -12.1454 | -0.75932 | -0.12526 |
| C  | -11.6213 | -3.14428 | -0.25334 |
| C  | -9.31054 | -3.94817 | -0.28681 |
| C  | -12.5543 | -2.10462 | -0.20491 |

|   |          |          |          |
|---|----------|----------|----------|
| C | -13.1034 | 0.275529 | -0.07634 |
| O | -12.0627 | -4.44563 | -0.28799 |
| C | -8.51288 | -4.85906 | -0.3466  |
| O | -13.8957 | -2.39642 | -0.27404 |
| C | -13.929  | 1.161811 | -0.02552 |
| C | -12.4861 | -4.89325 | -1.58195 |
| C | -7.56186 | -5.90959 | -0.41077 |
| C | -14.4658 | -2.86196 | 0.955655 |
| C | -14.8802 | 2.212334 | 0.027368 |
| H | -12.7969 | -5.93106 | -1.45858 |
| H | -13.3274 | -4.2962  | -1.94401 |
| H | -11.6576 | -4.84618 | -2.29589 |
| C | -6.18478 | -5.624   | -0.50057 |
| C | -7.96834 | -7.25841 | -0.38737 |
| H | -15.522  | -3.04194 | 0.752603 |
| H | -13.9883 | -3.79051 | 1.279163 |
| H | -14.3721 | -2.10001 | 1.736204 |
| C | -14.4639 | 3.549564 | 0.185531 |
| C | -16.2603 | 1.947188 | -0.07677 |
| C | -5.2532  | -6.65211 | -0.56551 |
| H | -5.86622 | -4.5889  | -0.51888 |
| C | -7.02894 | -8.27974 | -0.4526  |
| H | -9.02517 | -7.48564 | -0.3143  |
| C | -15.3958 | 4.578001 | 0.237811 |
| H | -13.4043 | 3.759841 | 0.265273 |
| C | -17.1846 | 2.982761 | -0.02301 |
| H | -16.588  | 0.922263 | -0.20285 |
| C | -5.66851 | -7.98393 | -0.54227 |
| H | -4.19756 | -6.41378 | -0.63558 |
| H | -7.35894 | -9.31287 | -0.43249 |
| C | -16.7597 | 4.302239 | 0.134604 |
| H | -15.0569 | 5.601094 | 0.359723 |
| H | -18.2431 | 2.760209 | -0.10566 |
| H | -4.93818 | -8.7836  | -0.59316 |
| H | -17.4841 | 5.107909 | 0.175795 |
| H | -7.49568 | 8.338109 | 0.303396 |
